# Supplementary material for: Highly focused transcriptional response of Anopheles coluzzii to O’nyong nyong arbovirus during the primary midgut infection
Source: PubMed Central journal article supplement (PMC6038350; doi:10.1186/s12864-018-4918-0), 2018-07-09

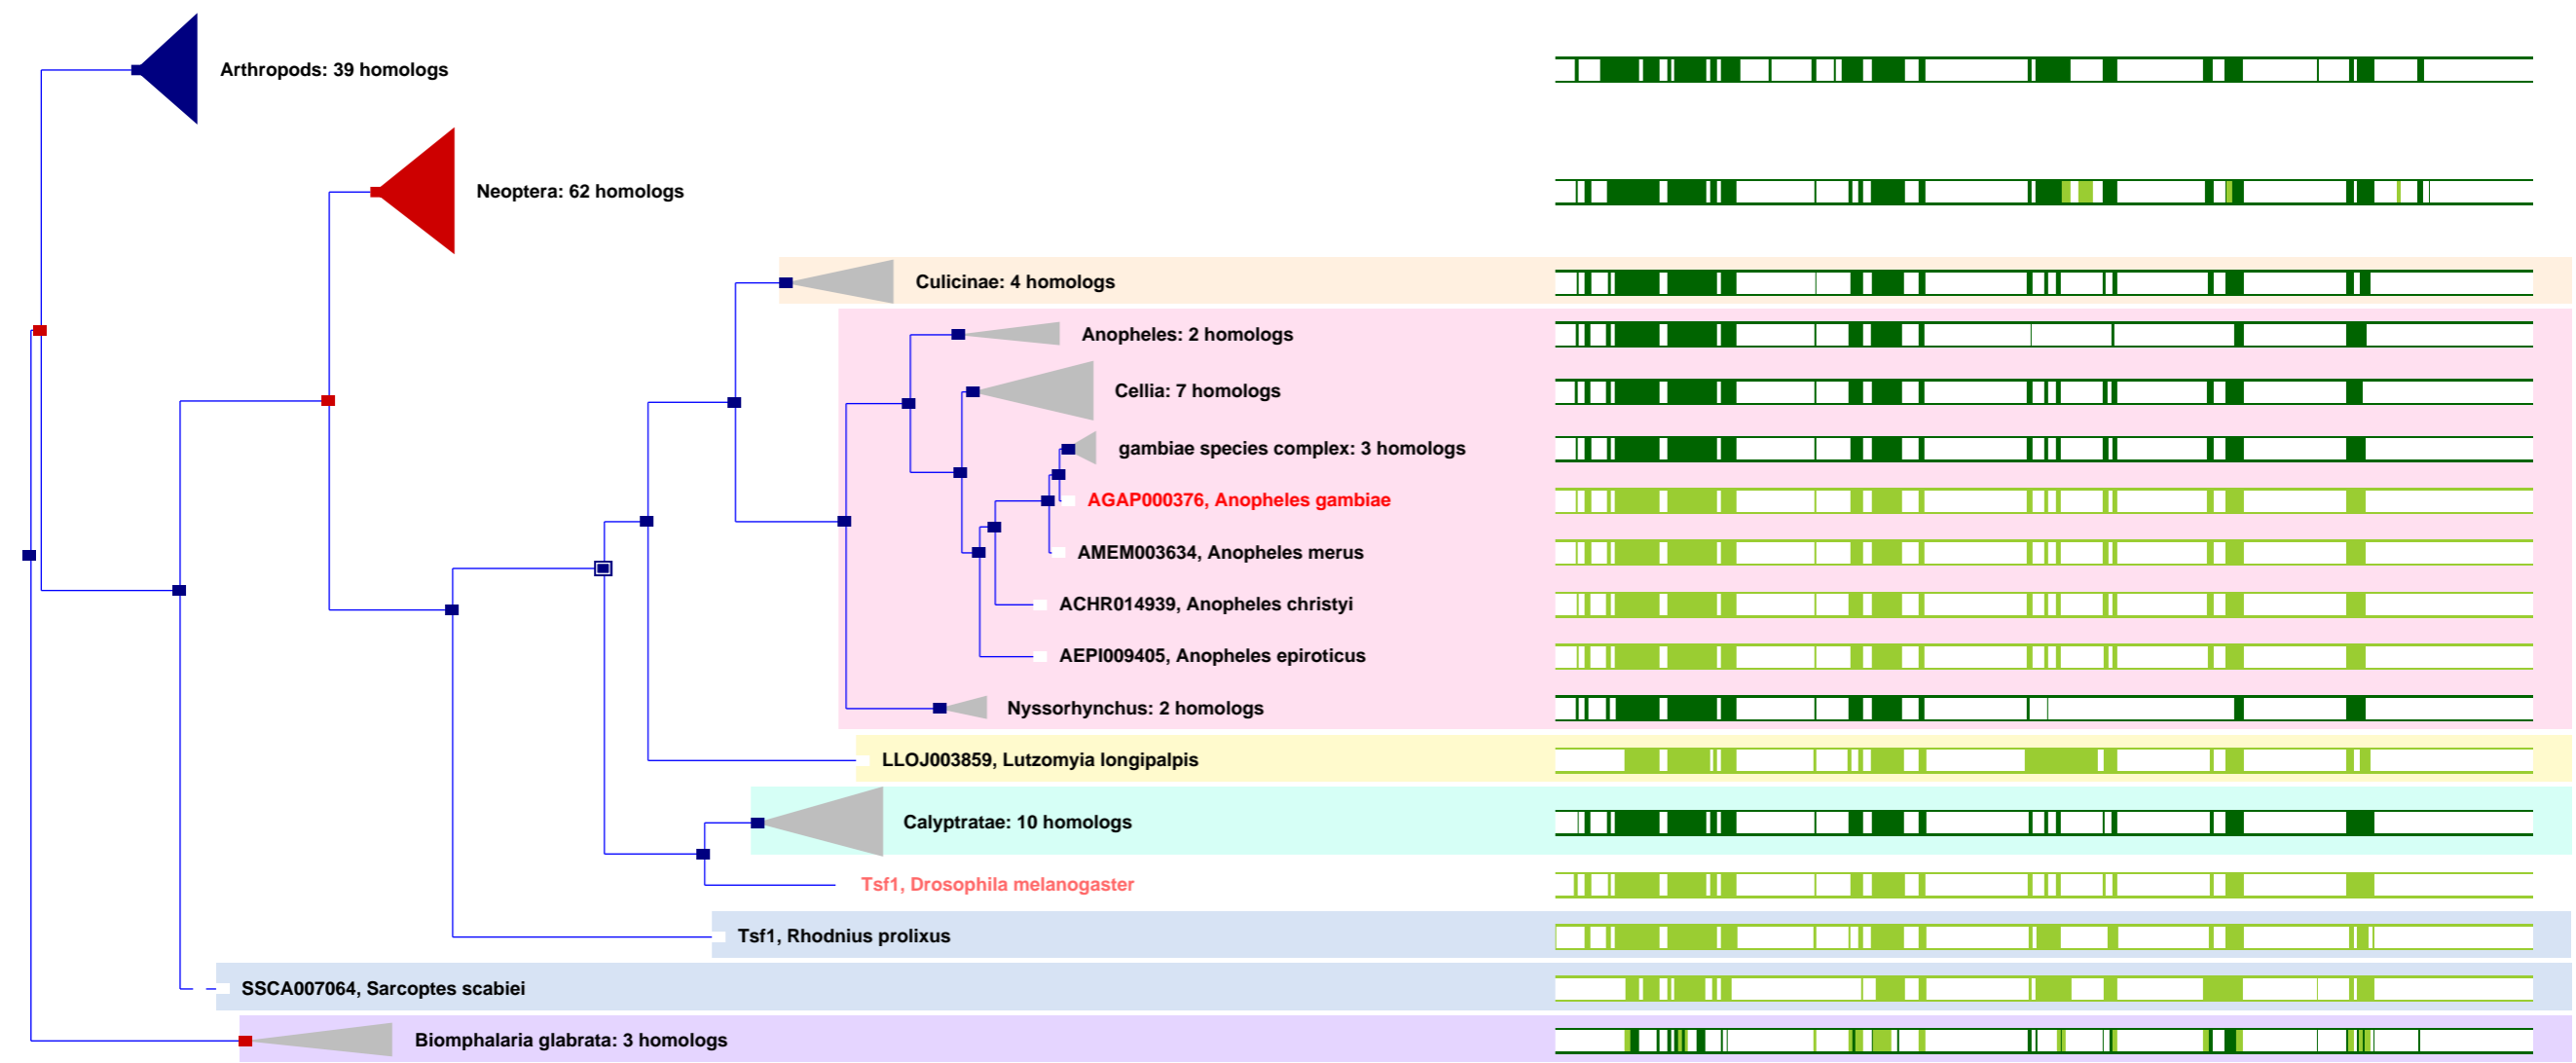

**LEGEND**

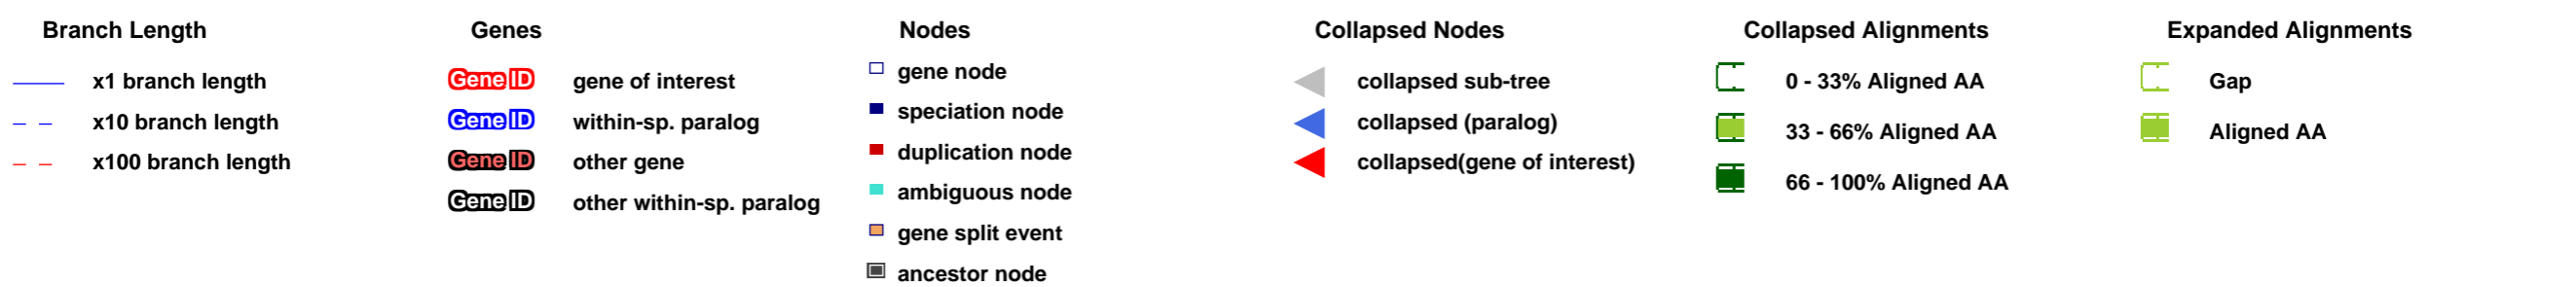

Supplement: 12864_2018_4918_MOESM2_ESM.pdf [file 12864_2018_4918_MOESM2_ESM.pdf]
