# Supplementary material for: Highly focused transcriptional response of Anopheles coluzzii to O’nyong nyong arbovirus during the primary midgut infection
Source: PubMed Central journal article supplement (PMC6038350; doi:10.1186/s12864-018-4918-0), 2018-07-09
Supplement: 12864_2018_4918_MOESM6_ESM.pdf [file 12864_2018_4918_MOESM6_ESM.pdf]

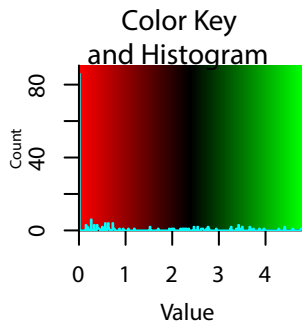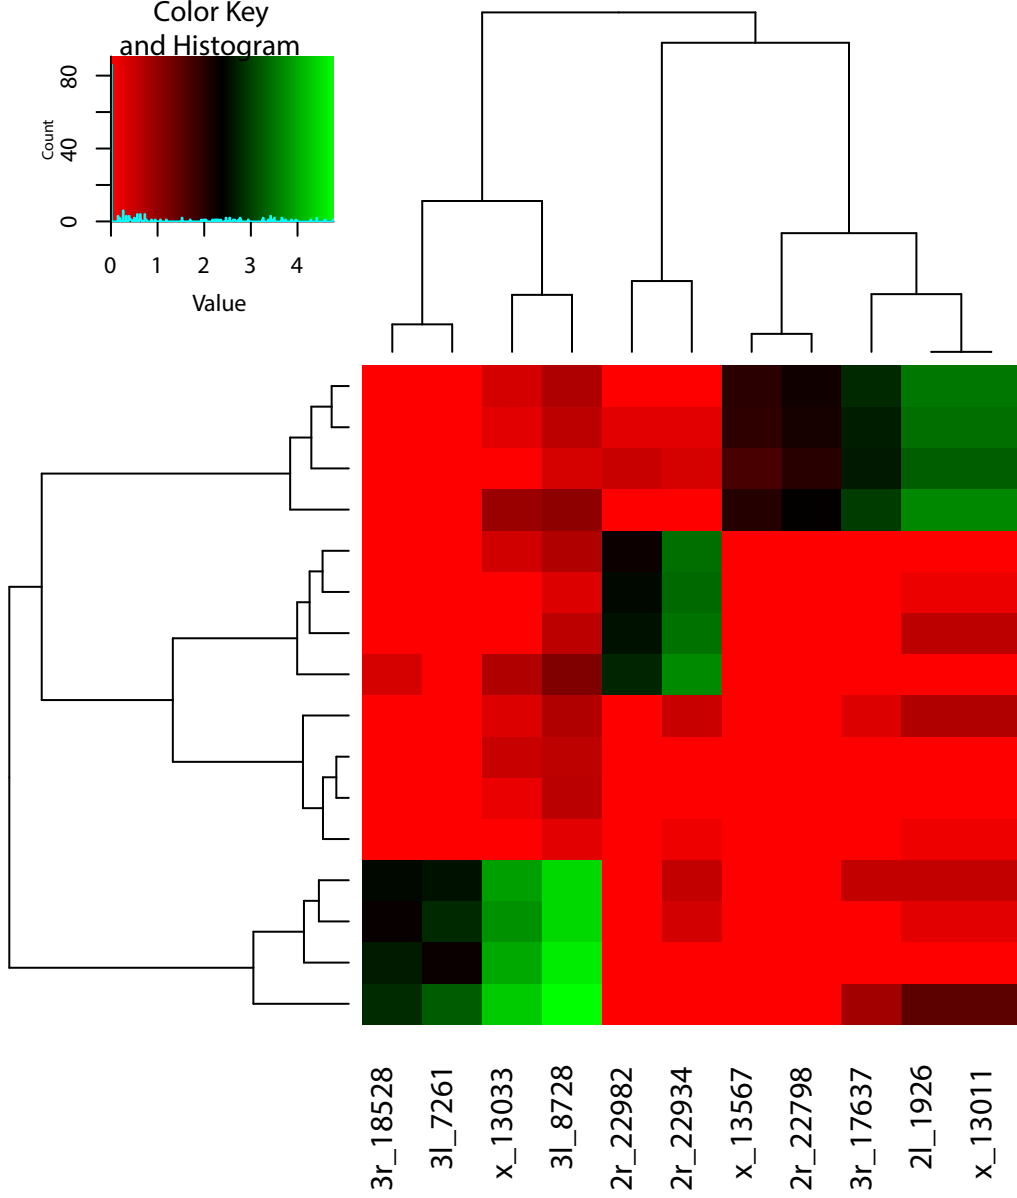

Non-infected dsRel2

Non-infected dsRel2

Infected dsRel2

Infected dsRel2

Non-infected dsLacZ

Non-infected dsLacZ

Infected dsLacZ

Infected dsLacZ

Infected No-dsRNA

Infected No-dsRNA

Non-infected No-dsRNA

Non-infected No-dsRNA

Non-infected dsStat-A

Non-infected dsStat-A

Infected dsStat-A

Infected dsStat-A
