# Supplementary material for: Highly focused transcriptional response of Anopheles coluzzii to O’nyong nyong arbovirus during the primary midgut infection
Source: BMC Genomics. 2018 Jul 9;19:526. doi: 10.1186/s12864-018-4918-0 (PMC6038350; doi:10.1186/s12864-018-4918-0)
Supplement: Supplementary file 4 — Table S2. A. coluzzii miRNAs and regulation by treatments. Table includes novel and known miRNAs, sequences, and differential regulation data after dsRNA treatments, in mosquitoes with and without ONNV infection. Genomic coordinates of miRNA genes are based on A. gambiae PEST strain genome (assembly AgamP3). (XLSX 59 kb) [file 12864_2018_4918_MOESM4_ESM.xlsx]

## Sheet: Sheet1
miRNA ID	class	consensus mature sequence	consensus star sequence	consensus precursor sequence	precursor coordinate	ONNV log2FoldChange	ONNV adjusted p-value	Rel2.infected log2FoldChange	Rel2.infected adjusted p-value	Rel2.non-infected log2FoldChange	Rel2.non-infected adjusted p-value	StatA.infected log2FoldChange	StatA.infected adjusted p-value	StatA.non-infected log2FoldChange	StatA.non-infected adjusted p-value	LacZ.infected log2FoldChange	LacZ.infected adjusted p-value	LacZ.non-infected log2FoldChange	LacZ.non-infected adjusted p-value
2l_2025	novel	uaggaacuucauaccgugcucu	agcgagguauagaguuccuacg	agcgagguauagaguuccuacgguaaucgauugaaacuuuguaggaacuucauaccgugcucu	2L:18991766..18991829:+	0.236	0.998185	0.387	0.755115	-0.058	0.987961	0.359	0.980053	0.091	0.9774	0.573	0.243875	-0.044	0.984137
2l_2023	novel	uaggaacuucauaccgugcucu	agcgagguauagaguuccu	agcgagguauagaguuccuaugugcccacuaggccguucgcuacucauaggaacuucauaccgugcucu	2L:18921545..18921614:+	0.236	0.998185	0.387	0.755115	-0.058	0.987961	0.359	0.980053	0.092	0.9774	0.573	0.243875	-0.043	0.984137
2l_2350	novel	acacauugacggucgugcgguuaag	ccccguacggccuagauguauu	acacauugacggucgugcgguuaagugcguggaacucuguucuucguaccccguacggccuagauguauu	2L:35691456..35691526:+	-0.599	0.998185	0.088	0.957678	0.041	0.987961	0.37	0.980053	-0.078	0.9774	-0.362	0.528907	0.07	0.984137
3l_8526	novel	uagccccagcuucguccgucg	uaugugaguacugguacuauauagg	uaugugaguacugguacuauauagguacuauauagccccagcuucguccgucg	3L:9749605..9749658:-	-0.482	0.998185	-0.727	0.179332	0.245	0.987961	-0.894	0.601351	-0.061	0.9774	-0.841	0.0611402	0.343	0.984137
2r_23767	novel	ugaaaaccgacgucgccagc	uggcgacgguuguuuuugacg	ugaaaaccgacgucgccagcgagcgaaacucgcaacgauuuggaggggcuggcgacgguuguuuuugacg	2R:40794921..40794991:-	-0.326	0.998185	-0.147	0.923475	0.059	0.987961	-0.309	0.980053	0.011	0.990627	-0.483	NA	0.192	0.984137
3l_7062	novel	cgaccgagcucuggugggc	uccagcagcugcggauc	cgaccgagcucuggugggcguggaugucguuugccagcaccuucagcuuggccagcuccaccuccagcagcugcggauc	3L:23620512..23620591:+	1.065	0.38352	0.415	0.755115	-0.229	0.987961	0.928	0.96964	0.042	0.9774	0.462	NA	-0.153	0.984137
unkn_39757	novel	cgaugaucgaguggcaggacgagug	ucggccagccgcuacuugacgugggc	cgaugaucgaguggcaggacgagugggaccgugcggcggcaacaccaucggccagccgcuacuugacgugggc	UNKN:4915816..4915889:-	-0.242	0.998185	-1.069	0.0149925	-0.16	0.987961	-0.762	0.831897	-0.133	0.9774	-1.001	0.0434607	0.022	0.984137
2r_19930	novel	ugaccuuguaugagcgcgcuugacu	uuggcugcugaugcauugcgcgu	ugaccuuguaugagcgcgcuugacuugggguuauuguuuuuuuccuucccguuuuuuuuuuggcugcugaugcauugcgcgu	2R:3352929..3353011:+	-0.517	0.998185	-0.111	0.934881	0.143	0.987961	0.124	0.980053	0.21	0.9774	-0.19	NA	0.262	0.984137
2l_2198	novel	ugaccuuguaugagcgcgcuugacu	uuggcugcugaugcauugcgcgu	ugaccuuguaugagcgcgcuugacuugggguuauuguuuuuuuccuucccguuuuuuuuuuggcugcugaugcauugcgcgu	2L:27576267..27576349:+	-0.517	0.998185	-0.111	0.934881	0.143	0.987961	0.124	0.980053	0.21	0.9774	-0.19	NA	0.262	0.984137
2r_19929	novel	ugaccuuguaugagcgcgcuugacu	uccuucguuuucccagcaguuauuggc	uccuucguuuucccagcaguuauuggcgaaugcuugaccuuguaugagcgcgcuugacu	2R:3352895..3352954:+	-0.52	0.998185	-0.085	0.957678	0.141	0.987961	0.124	0.980053	0.211	0.9774	-0.168	NA	0.268	0.984137
3l_5647	novel	uaagaggguuucgucagguuuggac	uccuucugaucaucuuccucucgaacu	uccuucugaucaucuuccucucgaacucggcuaagaggguuucgucagguuuggac	3L:980502..980558:+	-0.306	0.998185	0.154	0.923475	0.016	0.987961	0.532	0.96964	-0.11	0.9774	-0.047	NA	-0.076	0.984137
unkn_48880	novel	uaagaggguuucgucagguuuggac	uccuucugaucaucuuccucucgaacu	uccuucugaucaucuuccucucgaacucggcuaagaggguuucgucagguuuggac	UNKN:39241282..39241338:-	-0.306	0.998185	0.154	0.923475	0.016	0.987961	0.532	0.96964	-0.11	0.9774	-0.047	NA	-0.076	0.984137
3l_6913	novel	uacaucgacugagcuuugcuucc	uauguaaaguucucuuuauugacg	uauguaaaguucucuuuauugacgugaaaucuauucuacaaagguuguacaucgacugagcuuugcuucc	3L:20859612..20859682:+	-0.165	0.998185	-0.31	0.894608	0.323	0.987961	0.224	0.980053	0.237	0.9774	-0.394	NA	0.382	0.984137
3l_9095	novel	ugucuuuuccugcuuacugccg	acagcaaucagaaaaagacgcc	ugucuuuuccugcuuacugccgguagcauucgauauccuucgacagcaaucagaaaaagacgcc	3L:41240179..41240243:-	0.125	0.998185	-0.364	0.894608	-0.319	0.987961	0.342	0.980053	-0.144	0.9774	0.215	NA	-0.261	0.984137
unkn_47060	novel	uaauugcuuucguccggcucuggcu	ucaaccugugugaugaacguuauucaa	ucaaccugugugaugaacguuauucaauguuguguuucuucgccuuccucuuuuugucuuugcaacauaauugcuuucguccggcucuggcu	UNKN:28832875..28832967:-	0.158	0.998185	-0.188	0.923475	0.191	0.987961	-0.525	0.980053	0.241	0.9774	-0.134	NA	-0.028	0.984137
x_9436	novel	gcauguacuguggcaaggucgaggu	ugaccuccgccaccgagcuu	gcauguacuguggcaaggucgaggucgcuacaccguuuugaacgcgcugaccuccgccaccgagcuu	X:3338268..3338335:+	-0.145	0.998185	-0.376	0.837417	-0.336	0.987961	-0.41	0.980053	-0.136	0.9774	-0.194	NA	0.017	0.984137
x_9434	novel	gcauguacuguggcaaggucgaggu	ugaccuccgccaccgagcuu	gcauguacuguggcaaggucgaggucgcuacaccguuuugaacgcgcugaccuccgccaccgagcuu	X:3337757..3337824:+	-0.145	0.998185	-0.376	0.837417	-0.336	0.987961	-0.41	0.980053	-0.136	0.9774	-0.194	NA	0.017	0.984137
3l_7294	novel	accggagggcccauuaggcaacugu	cguuuccuuaguuuacccuc	accggagggcccauuaggcaacuguucuugcaaauaaucccaucgaacguuuccuuaguuuacccuc	3L:38010222..38010289:+	0.785	0.985766	0.727	0.634236	0.143	0.987961	1.434	0.537215	0.389	0.9774	0.272	NA	0.266	0.984137
x_14105	novel	uaguuucacugcaggcgucgacaag	uuguuggcgcguagugc	uaguuucacugcaggcgucgacaagugccucgaucaugccaauauggcucaccgcucucuccuggaaguuguuggcgcguagugc	X:20892275..20892360:-	-0.109	0.998185	-0.376	0.894608	-0.184	0.987961	0.086	0.980053	-0.129	0.9774	-0.101	NA	0.013	0.984137
x_13625	novel	uaguuucacugcaggcgucgacaag	uuguuggcgcguagugc	uaguuucacugcaggcgucgacaagugccucgaucaugccaauauggcucaccgcucucuccuggaaguuguuggcgcguagugc	X:17362784..17362869:-	-0.109	0.998185	-0.376	0.894608	-0.184	0.987961	0.086	0.980053	-0.129	0.9774	-0.101	NA	0.013	0.984137
x_10540	novel	uaguuucacugcaggcgucgacaag	uuguuggcgcguagugc	uaguuucacugcaggcgucgacaagugccucgaucaugccaauauggcucaccgcucucuccuggaaguuguuggcgcguagugc	X:20727015..20727100:+	-0.109	0.998185	-0.376	0.894608	-0.184	0.987961	0.086	0.980053	-0.129	0.9774	-0.101	NA	0.013	0.984137
3l_5463	novel	uccuaccggcugcgcca	ugcaagucgagcggagu	uccuaccggcugcgccaauugcaagucgagcggagu	3L:109648..109684:+	0.207	0.998185	0.01	0.999111	-0.642	0.631246	-0.552	0.96964	-0.723	0.371284	0.23	NA	0.119	0.984137
2l_2330	novel	ggcgaguacuuccccggcacgggc	cggccggggcaaguacuac	ggcgaguacuuccccggcacgggcgaccugcgcgacauuggggccggccggggcaaguacuac	2L:33290324..33290387:+	0.134	0.998185	0.391	0.894608	-0.186	0.987961	-0.142	0.980053	0.025	0.981077	0.439	NA	0.069	0.984137
unkn_43334	novel	ugccaugagguguacaucgucguca	acacggacgaggggguguggcgggu	acacggacgaggggguguggcggguucuaguucggguugugccaugagguguacaucgucguca	UNKN:11700175..11700239:-	0.153	0.998185	-0.026	0.987883	-0.158	0.987961	-0.013	0.997818	-0.049	0.9774	0.3	NA	0.024	0.984137
3l_7261	novel	cuccugcucgacgugca	accucgagcacgcugucc	accucgagcacgcuguccagggcagucguaucgucgcccaccaccuccugcucgacgugca	3L:36089919..36089980:+	NA	NA	NA	NA	NA	NA	1.67	0.351107	4.505	2.45733e-46	NA	NA	NA	NA
unkn_30156	novel	uacucgaaugcagaaguugggccu	uguucaaacccgcuacguacgcguac	uacucgaaugcagaaguugggccucgucaccgaucaucgguguuguuguuguucaaacccgcuacguacgcguac	UNKN:8872619..8872694:+	-0.064	0.998185	-0.175	0.923475	0.173	0.987961	0.365	0.980053	0.322	0.9774	-0.358	NA	-0.144	0.984137
unkn_42218	novel	uucauacugagacgcugccuuuggc	ucgaacagcaucucacuauagcgagc	ucgaacagcaucucacuauagcgagcccgaugacagcuugacguuuucauacugagacgcugccuuuggc	UNKN:9333217..9333287:-	-0.615	0.998185	-0.33	0.894608	-0.057	0.987961	0.094	0.980053	-0.191	0.9774	-0.702	NA	0.193	0.984137
unkn_31913	novel	uucauacugagacgcugccuuuggc	ucgaacagcaucucacuauagcgagc	ucgaacagcaucucacuauagcgagcccgaugacagcuugacguuuucauacugagacgcugccuuuggc	UNKN:13636812..13636882:+	-0.615	0.998185	-0.33	0.894608	-0.057	0.987961	0.094	0.980053	-0.191	0.9774	-0.702	NA	0.193	0.984137
unkn_38839	novel	gaggauugcaguucggugaaaagaa	uuguugccgauuccccugcucguuguuuug	gaggauugcaguucggugaaaagaaugugcgauuuaaauuacacauguuuguugccgauuccccugcucguuguuuug	UNKN:2661157..2661235:-	-0.213	0.998185	0.208	0.923475	0.171	0.987961	-0.739	0.96964	-0.317	0.9774	0.209	NA	0.104	0.984137
2r_23977	novel	gaggauugcaguucggugaaaagaa	uuguugccgauuccccugcucguuguuuug	gaggauugcaguucggugaaaagaaugugcgauuuaaauuacacauguuuguugccgauuccccugcucguuguuuug	2R:45873453..45873531:-	-0.213	0.998185	0.208	0.923475	0.171	0.987961	-0.739	0.96964	-0.317	0.9774	0.209	NA	0.104	0.984137
unkn_47208	novel	cgacacgugacggaaauggcgaccu	uucuccagcaaauccgaacgauuauc	uucuccagcaaauccgaacgauuaucggcgaggcuagaacuugccgacacgugacggaaauggcgaccu	UNKN:29600022..29600091:-	-0.23	0.998185	0.207	0.923475	0.085	0.987961	0.71	0.96964	0.157	0.9774	-1.124	NA	-0.676	0.256008
unkn_31087	novel	cgacacgugacggaaauggcgaccu	uucuccagcaaauccgaacgauuauc	uucuccagcaaauccgaacgauuaucggcgaggcuagaacuugccgacacgugacggaaauggcgaccu	UNKN:10981498..10981567:+	-0.23	0.998185	0.207	0.923475	0.085	0.987961	0.71	0.96964	0.157	0.9774	-1.124	NA	-0.676	0.256008
unkn_48285	novel	uuauugacgugucgcucgacgagga	uacugugcaccguugugaugaa	uuauugacgugucgcucgacgaggaugucaacuguauauccuacugugcaccguugugaugaa	UNKN:35443963..35444026:-	-0.111	0.998185	0.27	0.912875	-0.252	0.987961	0.795	0.943894	-0.159	0.9774	-0.237	NA	-0.253	0.984137
unkn_48491	novel	uuauugacgugucgcucgacgagga	uacugugcaccguugugaugaa	uuauugacgugucgcucgacgaggaugucaacuguauauccuacugugcaccguugugaugaa	UNKN:36490382..36490445:-	-0.111	0.998185	0.27	0.912875	-0.252	0.987961	0.795	0.943894	-0.159	0.9774	-0.237	NA	-0.253	0.984137
2l_1077	novel	ugacacuuuggauuugguucggcgg	ugcugucacacgaauuggcuaucug	ugcugucacacgaauuggcuaucugucacuuuugacacuuuggauuugguucggcgg	2L:5082172..5082229:+	-0.514	0.998185	-0.308	0.89609	-0.322	0.987961	-0.488	0.980053	0.038	0.9774	-0.349	NA	0.1	0.984137
2l_2154	novel	ugggaauguacgaccgaaggggaag	cuaugccacaggacgcucuucguaug	ugggaauguacgaccgaaggggaagcgcacacuaugccacaggacgcucuucguaug	2L:25349249..25349306:+	0.082	0.998185	-0.423	0.837417	0.374	0.987961	-0.071	0.980673	0.225	0.9774	-0.434	NA	0.094	0.984137
2r_24769	novel	uuuguuuggcgacgguauucug	ugaauagcacgcucucggaauugaau	uuuguuuggcgacgguauucugcgaagcucugaauguuuuucgggucgcuccuuucugaauagcacgcucucggaauugaau	2R:60565901..60565983:-	-0.319	0.998185	0.07	0.972477	-0.043	0.987961	-0.036	0.997818	-0.28	0.9774	-0.178	NA	-0.018	0.984137
2r_22478	novel	uuuguuuggcgacgguauucug	ugaauagcacgcucucggaauugaau	uuuguuuggcgacgguauucugcgaagcucugaauguuuuucgggucgcuccuuucugaauagcacgcucucggaauugaau	2R:60587698..60587780:+	-0.319	0.998185	0.07	0.972477	-0.043	0.987961	-0.036	0.997818	-0.28	0.9774	-0.178	NA	-0.018	0.984137
2l_4973	novel	caacucuugaauccuggccaguucc	auuaugcagggccuguu	caacucuugaauccuggccaguuccggaaaaagcauggcaaaggcuacaucucgauuaugcagggccuguu	2L:31710388..31710459:-	-0.436	0.998185	-0.762	0.568514	0.51	0.987961	-0.503	0.980053	0.323	0.9774	-0.765	NA	0.192	0.984137
2r_21208	novel	ugaaaucggcggugggaguugcgg	uggcccgagcggcgguugaagcggug	ugaaaucggcggugggaguugcgguggaaacggugguggcccgagcggcgguugaagcggug	2R:46019214..46019276:+	0.142	0.998185	-0.382	0.894608	0.259	0.987961	-0.124	0.980053	0.036	0.9774	-0.108	NA	-0.065	NA
2l_5316	novel	agcuaucgaaggaugugucggaga	uucuacaguccaccgcuc	uucuacaguccaccgcucuaccaacugagcuaucgaaggaugugucggaga	2L:46622572..46622623:-	0.471	0.998185	-0.165	0.923475	0.02	0.987961	-0.194	0.980053	0.142	0.9774	0.091	NA	-0.152	NA
unkn_46607	novel	ucgagacaaaaagcccugcacuggc	ucggucgcagcaacggucuccccgcc	ucgagacaaaaagcccugcacuggccgcaaggagaguucagcuuucccagcggaaucggucgcagcaacggucuccccgcc	UNKN:27100463..27100544:-	-0.041	0.998185	-0.254	0.923475	0.273	0.987961	0.434	0.980053	-0.039	0.9774	0.032	NA	0.121	NA
2l_3625	novel	uagguacuggccaagauuccaacg	gugggagucuugccagcagucgaaca	uagguacuggccaagauuccaacguggucuuggugggagucuugccagcagucgaaca	2L:2595785..2595843:-	0.119	0.998185	-0.401	0.894608	-0.015	0.987961	0.39	0.980053	0.081	0.9774	0.062	NA	0.074	NA
3l_7329	novel	gcgggaggguuucugggcggca	aacgaccugguucgacuguuuggcc	aacgaccugguucgacuguuuggccuuugcauugcagcgggaggguuucugggcggca	3L:38857218..38857276:+	-0.163	0.998185	-0.993	0.286816	-0.294	0.987961	-0.652	0.980053	0.351	0.9774	-0.471	NA	0.218	NA
3r_18542	novel	uaauuccagcuucguccgucg	ugucucagaggcguaagugaguacu	ugucucagaggcguaagugaguacugguacuauauagguacuauauaauuccagcuucguccgucg	3R:23252395..23252461:-	-0.453	0.998185	0.266	0.912875	0.146	0.987961	-0.386	0.980053	-0.126	0.9774	-0.258	NA	0.22	0.984137
unkn_36315	novel	ugccgccuuaagccucugaaugagu	uucaauucaugcaacugguggugggc	uucaauucaugcaacugguggugggccgugccgccuuaagccucugaaugagu	UNKN:35821721..35821774:+	-0.577	0.998185	-0.269	0.923475	0.293	0.987961	0.215	0.980053	0.183	0.9774	-0.432	NA	0.349	NA
unkn_31651	novel	ugccgccuuaagccucugaaugagu	uucaauucaugcaacugguggugggc	uucaauucaugcaacugguggugggccgugccgccuuaagccucugaaugagu	UNKN:12755049..12755102:+	-0.577	0.998185	-0.269	0.923475	0.293	0.987961	0.215	0.980053	0.183	0.9774	-0.432	NA	0.349	NA
unkn_43553	novel	uuucaguucguugcuggcgccuuga	uauccgccgguggcccucugcgacaga	uuucaguucguugcuggcgccuugaaaauugguuccauugucggaguaaauauccgccgguggcccucugcgacaga	UNKN:12354949..12355026:-	-0.665	0.998185	0.02	0.999111	0.027	0.987961	0.051	0.997818	-0.15	0.9774	-0.438	NA	0.121	NA
2r_19902	novel	aaggaaucgcucgacgacgugcc	gcacucgaucgaucgaauccauc	aaggaaucgcucgacgacgugccgaugaaucuggaaacugcacucgaucgaucgaauccauc	2R:2995190..2995252:+	0.508	0.998185	-0.314	0.912875	0.407	0.987961	0.193	0.980053	0.25	0.9774	-0.192	NA	-0.061	NA
2r_23658	novel	aacgcuuguaaugggagauggaccu	uccaugcgaagauggcaggcggcu	uccaugcgaagauggcaggcggcuuggaauaacgcuuguaaugggagauggaccu	2R:39003892..39003947:-	-0.03	0.998185	-0.301	0.923475	0.118	0.987961	0.105	0.980053	-0.196	0.9774	0.021	NA	0.003	NA
x_13112	novel	aacgcuuguaaugggagauggaccu	uccaugcgaagauggcaggcggcu	uccaugcgaagauggcaggcggcuuggaauaacgcuuguaaugggagauggaccu	X:10988452..10988507:-	-0.03	0.998185	-0.301	0.923475	0.118	0.987961	0.105	0.980053	-0.196	0.9774	0.021	NA	0.003	NA
2r_20075	novel	aacgcuuguaaugggagauggaccu	uccaugcgaagauggcaggcggcu	uccaugcgaagauggcaggcggcuuggaauaacgcuuguaaugggagauggaccu	2R:12232715..12232770:+	-0.03	0.998185	-0.301	0.923475	0.118	0.987961	0.105	0.980053	-0.196	0.9774	0.021	NA	0.003	NA
unkn_36308	novel	ugcuaacgcaucggucgcgcugu	uacgacuggggcuguugcgcacgcacc	ugcuaacgcaucggucgcgcugucgacugucaugugaauuaugccgugaucgauacgacuggggcuguugcgcacgcacc	UNKN:35781727..35781807:+	-0.323	0.998185	0.009	0.999111	0.069	NA	0.206	0.980053	0.074	0.9774	-0.206	NA	0.153	NA
3l_9093	novel	uguuuggaugggucggaugagc	ucaccggcccuguccggacgg	uguuuggaugggucggaugagcuggugacguuuugugcucaccggcccuguccggacgg	3L:41157822..41157881:-	-0.388	0.998185	-1.121	0.179332	-0.203	0.987961	-1.181	0.780278	0.244	0.9774	-1.456	NA	-0.068	NA
unkn_43091	novel	cacagaauaacgaagcgagcucagu	uuuucguuuauuagaguugcuguuacag	cacagaauaacgaagcgagcucaguugcacaggcuauguugccacggguguagcuuuucguuuauuagaguugcuguuacag	UNKN:11105000..11105082:-	0.034	0.998185	0.301	0.923475	0.187	0.987961	0.07	0.997818	-0.159	0.9774	0.234	NA	-0.063	NA
x_13567	novel	gcugccgcugcuguugaaguu	cgaggagcuggaguguagcgagcc	gcugccgcugcuguugaaguugcugcuccggaggacgacagugacgaggagcuggaguguagcgagcc	X:15800901..15800969:-	NA	NA	2.82	2.30823e-08	2.689	6.25726e-17	NA	NA	NA	NA	NA	NA	NA	NA
3l_7320	novel	cacuggcagagcugcacuaugcacu	ugcagcggcaacucggccggcccaga	cacuggcagagcugcacuaugcacucaaaaagugcagcggcaacucggccggcccaga	3L:38667891..38667949:+	-0.223	0.998185	0.007	0.999111	-0.08	0.987961	-0.527	0.980053	-0.217	0.9774	-0.412	NA	-0.053	NA
2r_23397	novel	accggcuccucaccuaaggcuc	cguggauguggagccggcucc	accggcuccucaccuaaggcucaggagccguugaagcgaagccguggauguggagccggcucc	2R:29627668..29627731:-	0.039	0.998185	-0.086	NA	-0.039	NA	-0.591	0.980053	-0.017	NA	-0.021	NA	-0.038	NA
2l_1849	novel	uauuaguaagugucgcacuguga	uccagauugugagcuaguuggcagguu	uccagauugugagcuaguuggcagguuguucuguguugaucguaagcggggcauucuauuaguaagugucgcacuguga	2L:13414160..13414239:+	-0.492	0.998185	0.155	0.934881	0.131	0.987961	0.38	0.980053	-0.108	0.9774	-0.164	NA	0.18	NA
unkn_25537	novel	uaagacugagaaaggcaauuccaaa	ugaagagagccuuuuaaguaucguagcu	ugaagagagccuuuuaaguaucguagcuugucuacgucggcuaaauucgaauugcgaucuauaagacugagaaaggcaauuccaaa	UNKN:1258222..1258308:+	-0.265	0.998185	0.031	0.987883	0.01	NA	0.265	0.980053	-0.293	NA	-0.055	NA	-0.016	NA
unkn_46478	novel	uaagacugagaaaggcaauuccaaa	ugaagagagccuuuuaaguaucguagcu	ugaagagagccuuuuaaguaucguagcuugucuacgucggcuaaauucgaauugcgaucuauaagacugagaaaggcaauuccaaa	UNKN:26509070..26509156:-	-0.265	0.998185	0.031	0.987883	0.01	NA	0.265	0.980053	-0.293	NA	-0.055	NA	-0.016	NA
2l_5039	novel	uucuacuggaccgauucacgugacg	uaugcuggaugcggucugaucaucgcc	uucuacuggaccgauucacgugacgugauaugcuggaugcggucugaucaucgcc	2L:35986476..35986531:-	0.01	0.998185	0.151	NA	0.111	0.987961	1.042	0.96964	-0.099	NA	0.394	NA	0.009	NA
3r_17396	novel	uucuacuggaccgauucacgugacg	uaugcuggaugcggucugaucaucgcc	uucuacuggaccgauucacgugacgugauaugcuggaugcggucugaucaucgcc	3R:40163674..40163729:+	0.01	0.998185	0.151	NA	0.111	0.987961	1.042	0.96964	-0.099	NA	0.394	NA	0.009	NA
3l_5645	novel	cuuuguuuaaauuuguuugucgcc	ugaguuaacaaucgaugacagguug	ugaguuaacaaucgaugacagguugaagguagcuaugcagaaaaggcuuuguuuaaauuuguuugucgcc	3L:970363..970433:+	-0.121	0.998185	-0.333	NA	-0.008	NA	-0.211	0.980053	-0.071	NA	-0.291	NA	-0.2	NA
unkn_47766	novel	cuuuguuuaaauuuguuugucgcc	ugaguuaacaaucgaugacagguug	ugaguuaacaaucgaugacagguugaagguagcuaugcagaaaaggcuuuguuuaaauuuguuugucgcc	UNKN:32450041..32450111:-	-0.121	0.998185	-0.333	NA	-0.008	NA	-0.211	0.980053	-0.071	NA	-0.291	NA	-0.2	NA
x_11670	novel	aggaauacgagcggcuucuugaggc	ccucaucccacucccacgucgugaucgcu	aggaauacgagcggcuucuugaggccguugagcuggaggccucaucccacucccacgucgugaucgcu	X:22981490..22981558:+	-0.001	0.998185	-0.117	0.954104	-0.011	0.991571	0.806	0.96964	0.267	0.9774	0.063	NA	0.16	NA
x_12810	novel	ucagcaucccgacagacagacg	acuguuugucggugguggugcu	acuguuugucggugguggugcuauugcgcguguggcagcgaaaacccucucagcaucccgacagacagacg	X:1032266..1032337:-	0.357	0.998185	-0.202	0.923475	-0.067	NA	-0.187	0.980053	-0.028	NA	0.019	NA	-0.061	NA
2l_2170	novel	augguggucguggaggaugucu	agcaccaccaccaccac	augguggucguggaggaugucucaucaucgaucgagcaccaccaccaccac	2L:25931707..25931758:+	0.011	0.998185	0.014	0.999111	-0.099	NA	0.074	0.997818	0.164	NA	-0.297	NA	-0.048	NA
unkn_31783	novel	uuuuggauacugggugcuagauugc	caggcuaugcugaacgagauucguca	caggcuaugcugaacgagauucgucaaacuuuuuggauacugggugcuagauugc	UNKN:13237823..13237878:+	-0.058	0.998185	0.155	NA	0.015	NA	-0.15	0.980053	0.091	NA	0.13	NA	0.117	NA
2r_23518	novel	ugguuccagccggacgggcuc	agcgcguccgacagcaggaccagc	agcgcguccgacagcaggaccagcuggaggagccggaaaaugggcaacucaccgugcgcugcugguuccagccggacgggcuc	2R:33443487..33443570:-	0.019	0.998185	0.013	NA	-0.025	NA	0.855	0.96964	0.065	NA	0.108	NA	0.052	NA
2r_20080	novel	cgcucgguuccaucgcccg	cguggugguuccagugcggaaaga	cgcucgguuccaucgcccgugccaucaucacugcucgcguggugguuccagugcggaaaga	2R:12802746..12802807:+	-0.388	0.998185	-0.222	0.923475	0.02	NA	-0.287	0.980053	-0.043	NA	-0.382	NA	0.109	NA
unkn_45925	novel	uaggugcuauuggugguuuggaugc	uuuggaugcuauuggugguuuggaugc	uaggugcuauuggugguuuggaugcuauuggugguuuggaugcuauuggugguuuggaugcuauuggugguuuggaugc	UNKN:24508174..24508253:-	0.002	0.998185	-0.062	NA	0.039	NA	0.017	0.997818	-0.004	NA	-0.097	NA	-0.19	NA
unkn_39559	novel	accagauggauguuuuugcggacgu	uaucgcaaaaucgugccagcguacca	accagauggauguuuuugcggacguugacccgcgccgauuaucgcaaaaucgugccagcguacca	UNKN:4070588..4070653:-	0.056	0.998185	-0.156	NA	-0.149	NA	0.042	0.997818	0.067	NA	-0.087	NA	-0.111	NA
2l_569	novel	caggagugcagcguaugaaagcguu	ugucuucagcaggugcaucagggc	ugucuucagcaggugcaucagggccauucaggagugcagcguaugaaagcguu	2L:1261598..1261651:+	0.337	0.998185	-0.068	NA	0.079	NA	0.221	0.980053	0.016	NA	0.084	NA	-0.058	NA
x_13906	novel	uauguaugggccgucccgaguau	ucucggguaggccuaauauaua	ucucggguaggccuaauauauauguuucuguaauauauauguaugggccgucccgaguau	X:20392180..20392240:-	-0.311	0.998185	0.142	NA	-0.121	NA	0.008	0.997818	-0.049	NA	-0.199	NA	-0.122	NA
3r_18532	novel	cugcugcuacugcacccuggca	uugggggguguaauuguugaagc	uugggggguguaauuguugaagcagcgcucugccugcugcuacugcacccuggca	3R:22395659..22395714:-	0.15	0.998185	-0.041	NA	0.055	NA	-0.587	0.980053	0.055	NA	0.263	NA	0.06	NA
unkn_38638	novel	uauuuaucgccgagugcuuuugau	uuagaagcguucuggcaucuuuuggga	uuagaagcguucuggcaucuuuugggagagcaaaauuagucuucguccucaaaaucuuaagcaacauauuuaucgccgagugcuuuugau	UNKN:2422427..2422517:-	0.141	0.998185	-0.211	NA	0.16	NA	0.138	0.980053	0.048	NA	0.05	NA	0.103	NA
2r_22764	novel	uugaucaccaucggcgggccc	ucccagcauggcguacagcuc	ucccagcauggcguacagcucgcacgcgaacggcccaaagguccaggucucgugccagcaguugaucaccaucggcgggccc	2R:674323..674405:-	-0.173	0.998185	-0.171	NA	-0.048	NA	0.627	0.980053	-0.003	NA	-0.095	NA	-0.055	NA
2r_19797	novel	uugaucaccaucggcgggccc	ucccagcauggcguacagcuc	ucccagcauggcguacagcucgcacgcgaacggcccaaagguccaggucucgugccagcaguugaucaccaucggcgggccc	2R:736766..736848:+	-0.173	0.998185	-0.171	NA	-0.048	NA	0.627	0.980053	-0.003	NA	-0.095	NA	-0.055	NA
2r_19783	novel	uugaucaccaucggcgggccc	ucccagcauggcguacagcuc	ucccagcauggcguacagcucgcacgcgaacggcccaaagguccaggucucgugccagcaguugaucaccaucggcgggccc	2R:672312..672394:+	-0.173	0.998185	-0.171	NA	-0.048	NA	0.627	0.980053	-0.003	NA	-0.095	NA	-0.055	NA
2l_1875	novel	ccagacgggcggccgauccucacc	gggagggccagccggauggg	gggagggccagccggaugggcacuugcaguacgagcugcuguaccaucuggcccagacgggcggccgauccucacc	2L:13698443..13698519:+	-0.182	0.998185	-0.139	0.934881	0.15	NA	-0.656	0.980053	0.007	NA	-0.379	NA	0.063	NA
x_12077	novel	ugacggguuuggucucuccagc	agagaccagacccgucaggcg	agagaccagacccgucaggcgcacacuguggcugacggguuuggucucuccagc	X:23502528..23502582:+	0.234	0.998185	0.08	0.972477	0.16	NA	0.371	0.980053	-0.015	NA	0.248	NA	0.028	NA
2r_21741	novel	ugcgacggcuugcuggugggcggc	ugcuggugggcgugaucguuuccc	ugcgacggcuugcuggugggcggcugcggcggcuugcggcugggcggcggacguuuccuuguaagcggcugcggcggcuugcuggugggcgugaucguuuccc	2R:58018730..58018833:+	-0.06	0.998185	-0.235	0.89609	-0.372	0.987961	-0.201	0.980053	-0.017	0.988055	-0.205	0.696891	-0.101	0.984137
2r_21977	novel	ugcgacggcuugcuggugggcggc	ugcuggugggcgugaucguuuccc	ugcgacggcuugcuggugggcggcugcggcggcuugcggcugggcggcggacguuuccuuguaagcggcugcggcggcuugcuggugggcgugaucguuuccc	2R:58077989..58078092:+	-0.06	0.998185	-0.235	0.89609	-0.372	0.987961	-0.201	0.980053	-0.017	0.988055	-0.205	0.696891	-0.101	0.984137
unkn_26432	novel	gaggucccgaaagcgucgcuggcgg	gucgggcaaugcucgggggaggac	gaggucccgaaagcgucgcuggcggaguagcggugcuuccggugccuggaacguggccacuucgucgggcaaugcucgggggaggac	UNKN:2111664..2111751:+	0.07	0.998185	-0.108	0.957644	-0.105	NA	-0.657	0.980053	-0.084	NA	-0.25	NA	-0.135	NA
x_9925	novel	gaggauggucgagucggagucg	ggcaggucgcaccggugcgug	ggcaggucgcaccggugcguguucuccgagaugaggauggucgagucggagucg	X:13902945..13902999:+	-0.247	0.998185	0.257	0.923475	0.116	0.987961	-0.091	0.980673	0.288	0.9774	-0.508	NA	0.149	NA
3r_17673	novel	uugaugaugagcuguugucccgggg	ggcggcggcgaugaugccg	ggcggcggcgaugaugccgcguucgcguuccucgaguugcgacuguugaugaugagcuguugucccgggg	3R:47684544..47684614:+	-0.32	0.998185	-0.692	0.568514	-0.411	0.987961	-0.724	0.96964	0.044	0.9774	-0.851	0.0934893	0.067	0.984137
3l_6767	novel	uugaugaugagcuguugucccgggg	ccggggcggcggcgaugaugcc	ccggggcggcggcgaugaugccgcguucgcguuccgcgaguugcgacuguugaugaugagcuguugucccgggg	3L:17004792..17004866:+	-0.32	0.998185	-0.692	0.568514	-0.411	0.987961	-0.724	0.96964	0.044	0.9774	-0.851	0.0934893	0.067	0.984137
unkn_27927	novel	cgaaagcuuggucgagucgcugacc	ucaguuugacucccagcuuuucggg	ucaguuugacucccagcuuuucgggaaagcgcuggcuaugacuggguucgcccgucaaguuaacagcgucgaaagcuuggucgagucgcugacc	UNKN:5314627..5314721:+	0.695	0.998185	-0.05	0.987883	-0.212	0.987961	0.468	0.980053	-0.133	0.9774	0.63	NA	-0.204	NA
3l_7338	novel	ggcauuggccgacgggcu	cucgugcggcauaaugccaa	ggcauuggccgacgggcucgacgguagcacguucucgugcggcauaaugccaa	3L:39521868..39521921:+	-0.175	0.998185	0.368	NA	-0.076	NA	1.112	0.943894	-0.058	NA	0.238	NA	0.076	NA
2r_19820	novel	ucgaucgugcuguucgugccgggc	gcuuuacaccacggucgaaa	ucgaucgugcuguucgugccgggcguacugucgauuccgcugcuuuacaccacggucgaaa	2R:1403875..1403936:+	-0.288	0.998185	0.113	0.954104	0.078	NA	-0.401	0.980053	0.166	NA	-0.167	NA	0.192	NA
unkn_27503	novel	cggaaugugucgucgccuaugaug	acagcgauggcgucuccggc	acagcgauggcgucuccggcuggacgugcuagguuugcugcaggugaggcggaaugugucgucgccuaugaug	UNKN:4306435..4306508:+	0.117	0.998185	0.449	0.837417	0.159	0.987961	0.609	0.978322	-0.108	0.9774	0.309	NA	0.032	0.984137
2l_3481	novel	gccacuagucugcagccggagc	uucgacuaccaacugacggcuc	gccacuagucugcagccggagcuggcguccaacaauuucgacuaccaacugacggcuc	2L:2152605..2152663:-	0.036	0.998185	0.273	NA	-0.047	NA	0.314	0.980053	0.046	NA	0.202	NA	0.024	NA
2r_20260	novel	gggacgagcgucgacagguugacg	gcagcccgucgccuccgccugc	gggacgagcgucgacagguugacguugcgcggcgcgaacaggugcagcugcugcaggcagcccgucgccuccgccugc	2R:17678709..17678787:+	-0.354	0.998185	0.702	0.568514	0.454	0.987961	0.566	0.980053	0.314	0.9774	-0.058	NA	0.193	0.984137
x_13033	novel	cgaagcugcacgucgag	uggcgcugaagcacggc	cgaagcugcacgucgagucgagcgagccgggccugcccagcucguacgacaucuaccgcucgauggcgcugaagcacggc	X:6056912..6056992:-	0.218	0.998185	0.074	NA	0.02	NA	8.978	2.90098e-58	7.04	1.32936e-133	-0.047	NA	-0.043	NA
3r_18266	novel	guccacgccggccgggcuaaga	cgcgcccggccggugugcccag	cgcgcccggccggugugcccagccgcuggaucaucucguccacgccggccgggcuaaga	3R:11222789..11222848:-	0.155	0.998185	-0.323	0.89609	-0.042	NA	-0.256	0.980053	0.07	NA	-0.091	NA	0.101	NA
2r_20259	novel	gggacgagcgucgacagguugacg	ucaaauaguugcugcucagguucugg	ucaaauaguugcugcucagguucuggcacagguucgggacgagcgucgacagguugacg	2R:17678674..17678733:+	-0.357	0.998185	0.702	0.568514	0.454	0.987961	0.53	0.980053	0.313	0.9774	-0.058	NA	0.199	0.984137
unkn_44572	novel	cgaaagcuuggucgagucgcugacc	ucaguuugacucccagcuuaucggg	ucaguuugacucccagcuuaucgggaaagcgcuggcuaugacuggguucgcccgucaaguuaacagcgucgaaagcuuggucgagucgcugacc	UNKN:17235833..17235927:-	0.695	0.998185	-0.05	0.987883	-0.212	0.987961	0.468	0.980053	-0.133	0.9774	0.63	NA	-0.204	NA
2r_20671	novel	uuucggaggcuguugggcgc	gugccagcgggcuuacgaaacacacua	gugccagcgggcuuacgaaacacacuagagcucgugguagcgcgcuguuucggaggcuguugggcgc	2R:34475678..34475745:+	-0.006	0.998185	0.071	0.972477	-0.139	0.987961	0.516	0.980053	-0.009	0.990627	0.059	NA	0.023	0.984137
x_9805	novel	ucggacacgggcacgcugcgugcca	gcaccaagcacaccgaauguccgacc	gcaccaagcacaccgaauguccgaccacgaugcguuuuuccaacaagaaauccgccgugguagucggacacgggcacgcugcgugcca	X:12796426..12796514:+	0.305	0.998185	0.106	0.934881	-0.31	0.987961	0.369	0.980053	0.079	0.9774	0.423	NA	-0.131	0.984137
2l_2087	novel	auggugcacauugccggguuggg	uguacggguacgugcgcggugu	uguacggguacgugcgcgguguuccgcugaagaaggagaacauggugcacauugccggguuggg	2L:22709572..22709636:+	-0.198	0.998185	-0.338	0.89609	-0.363	0.987961	-0.329	0.980053	-0.539	0.69733	-0.238	NA	-0.329	NA
3l_5827	novel	ggggcucgagcugcggcgggauugc	ugcggcagccgaagcaacuugcgcgu	ugcggcagccgaagcaacuugcgcguugcugucggugaugcggggcucgagcugcggcgggauugc	3L:1636160..1636226:+	-0.257	0.998185	-0.577	0.513947	0.04	0.987961	-0.211	0.980053	0.081	0.9774	-0.642	0.218899	0.15	0.984137
3r_19756	novel	ggggcucgagcugcggcgggauagc	ucgccgaugacgugcugcggugcugc	ucgccgaugacgugcugcggugcugcagccgaagcaacuugcgcguugcuguugguguugcggggcucgagcugcggcgggauagc	3R:53165663..53165749:-	-0.196	0.998185	-0.296	0.894608	0.037	0.987961	0.026	0.997818	-0.164	0.9774	-0.421	NA	0.071	0.984137
x_9861	novel	cgaaagcuugguugagucgcugacc	ucaguuugacucccagcuuuucggg	ucaguuugacucccagcuuuucgggaaagcgcuggccaugauuggguucgcccgucaagcuaacagcgucgaaagcuugguugagucgcugacc	X:12990612..12990706:+	-0.185	0.998185	-0.265	0.923475	-0.139	0.987961	-0.454	0.980053	0.018	0.988757	-0.3	NA	0.037	NA
unkn_49206	novel	cucgguaucaggcugcggacuagga	cugucacguaacugaaaggccgggaa	cugucacguaacugaaaggccgggaaggacuucggcagcgaucgagugaucgaucgcugcgacucgguaucaggcugcggacuagga	UNKN:42140169..42140256:-	-0.507	0.998185	-0.631	0.634236	0.006	0.991571	0.155	0.980053	-0.449	0.9774	-0.782	NA	-0.156	0.984137
unkn_42121	novel	agagagaaaacggagcugcaggcug	gcagcagcuugcagaaagcucuga	agagagaaaacggagcugcaggcugugauuacccagcuccaagucgagcucgggcuuaugcggcagcagcuugcagaaagcucuga	UNKN:9096472..9096558:-	0.02	0.998185	-0.34	0.894608	-0.213	0.987961	-0.325	0.980053	-0.203	0.9774	-0.32	NA	-0.136	0.984137
2r_23170	novel	cacggcgcuggauuguaucau	cauacaacccagcccugggcgugag	cauacaacccagcccugggcgugagcgggcgcgcgcgagcgcacuugccacggcgcuggauuguaucau	2R:18202575..18202644:-	-0.226	0.998185	-0.362	0.89609	-0.159	NA	0.011	0.997818	-0.061	NA	-0.069	NA	0.12	NA
2r_22934	novel	uugcugcugcugaacggc	cgaguucagcaacggcagcagca	cgaguucagcaacggcagcagcaagucguugcugcugcugaacggc	2R:8082001..8082047:-	0.108	0.998185	-6.665	1.02252e-59	-6.088	2.99383e-108	-7.715	7.16406e-41	-5.938	8.6372e-93	-7.667	3.56571e-82	-5.805	1.05284e-121
2l_1804	novel	uagucgcugguagacccgggcgucc	augggggucaaaccagccaggag	uagucgcugguagacccgggcguccuccuccaccagcaggcagaugggggucaaaccagccaggag	2L:13050371..13050437:+	-0.021	0.998185	0.269	0.89609	0.457	0.987961	0.333	0.980053	0.446	0.93923	-0.034	NA	0.251	0.984137
3l_5962	novel	cgaugaucgaguggcaggacgagug	ccaucggccagccgcuacuugacg	cgaugaucgaguggcaggacgagugggaccgugcggcggcaacaccaucggccagccgcuacuugacg	3L:4305280..4305348:+	-0.242	0.998185	-1.069	0.0149925	-0.16	0.987961	-0.762	0.831897	-0.133	0.9774	-1.001	0.0434607	0.022	0.984137
3r_18528	novel	gaggugacggagguguuc	gcgcuuacgucgcucga	gcgcuuacgucgcucgacgcucgcaugaaggagggcgacgaggugacggagguguuc	3R:22245336..22245393:-	NA	NA	-0.082	NA	NA	NA	6.216	1.04502e-25	4.014	5.18594e-36	-0.101	NA	NA	NA
2l_2169	novel	augguggucguggaggaugucu	acuuccaucaugaccacggcgg	acuuccaucaugaccacggcggaugcacuugccaccggugcggagaugguggucguggaggaugucu	2L:25931662..25931729:+	-0.009	0.998185	-0.004	NA	-0.061	NA	0.994	0.96964	0.195	NA	-0.057	NA	-0.022	NA
3l_5956	novel	cgaugaucgaguggcaggacgagug	ccaucggccagccgcuacuugacg	cgaugaucgaguggcaggacgagugggaccgugcggcggcaacaccaucggccagccgcuacuugacg	3L:4300022..4300090:+	-0.242	0.998185	-1.069	0.0149925	-0.16	0.987961	-0.762	0.831897	-0.133	0.9774	-1.001	0.0434607	0.022	0.984137
3l_7219	novel	uacuaguagaagcgcggucaggacg	uacuguauccaccguggcua	uacuguauccaccguggcuacgagugccgcacguauugggcgcuugcuacuaguagaagcgcggucaggacg	3L:34123957..34124029:+	-0.211	0.998185	0	0.999111	-0.438	0.987961	-0.086	0.980053	-0.266	0.9774	-0.786	NA	-0.24	0.984137
x_13768	novel	aagguuuccauggaguugcagcug	gcuguacgcgauggacuuuc	gcuguacgcgauggacuuucauuaccuagcaacaccaaaugcugcuaugguaacgggaaagguuuccauggaguugcagcug	X:20080881..20080963:-	0.009	0.998185	-0.157	NA	0.13	NA	0.016	0.997818	0.02	NA	-0.084	NA	0	NA
unkn_42682	novel	aagguuuccauggaguugcagcug	gcuguacgcgauggacuuuc	gcuguacgcgauggacuuucauuaccuagcaacaccaaaugcugcuaugguaacgggaaagguuuccauggaguugcagcug	UNKN:10350739..10350821:-	0.009	0.998185	-0.157	NA	0.13	NA	0.016	0.997818	0.02	NA	-0.084	NA	0	NA
x_12933	novel	cggggauugaugcgcgcacuggagc	ccgagauggcacgcagcgugcccgug	cggggauugaugcgcgcacuggagcguacagcggugguagcuaccacauccaugggcgccgagauggcacgcagcgugcccgug	X:3321591..3321675:-	-0.106	0.998185	-0.291	0.912875	0.014	NA	0.105	0.980673	0.179	NA	-0.133	NA	0.048	NA
3l_7273	novel	ucacgguuggcacgagcacuguc	ccguccgagugccgugcuugccgugugc	ccguccgagugccgugcuugccgugugcgguucgccccagagcacaguucacgguuggcacgagcacuguc	3L:36538788..36538859:+	0.283	0.998185	-0.085	0.972477	0.141	0.987961	-0.273	0.980053	0.23	0.9774	0.23	NA	0.076	NA
3r_17637	novel	guuguugcugcuguugcc	caacaguccgaacagcga	caacaguccgaacagcgaaugcuaguacaccagcacgcgguugaugcugcugcugcugcugccguuguugcugcuguugcc	3R:44931142..44931223:+	0.071	0.998185	4.907	1.54275e-28	4.77	8.753e-60	0.534	0.980053	0.097	NA	0.086	NA	NA	NA
2l_1781	novel	agcgggcccaguaguacagugu	auuguauuauuggaguaagcagc	auuguauuauuggaguaagcagcagcggcagcagcgggcccaguaguacagugu	2L:12903010..12903064:+	-0.057	0.998185	-0.107	0.957678	0.005	NA	-0.024	0.997818	-0.032	0.9774	-0.092	NA	0.143	NA
2l_4754	novel	gaugaucugaucguuggccggg	cgcguacagccgguugagaucgacga	cgcguacagccgguugagaucgacgaacuggucgagauaguugaugaucugaucguuggccggg	2L:19245921..19245985:-	0.115	0.998185	-0.224	0.923475	0.138	NA	-0.621	0.980053	0.112	NA	0.034	NA	0.037	NA
2l_2088	novel	auggugcacauugccggguuggg	cgacccgugcccgcugccgucg	auggugcacauugccggguugggcgauaugccgaucgaggagcugagcacacugcccgacccgugcccgcugccgucg	2L:22709613..22709691:+	-0.26	0.998185	-0.338	0.89609	-0.373	0.987961	0.19	0.980053	-0.55	0.69733	-0.238	NA	-0.3	NA
unkn_38709	novel	gcacauguucuaccggucgucgggu	ucgaggcagcgauagcaguccac	gcacauguucuaccggucgucgggugaacggcagucaugggcccaauggcccaacucgaggcagcgauagcaguccac	UNKN:2486891..2486969:-	-0.733	0.38352	-0.106	0.934881	0.452	0.987961	-0.079	0.980053	0.533	0.631361	-0.521	0.356432	0.69	0.110175
x_13011	novel	gcugcugcuguugaaguu	cuucgccugcagcugcgc	gcugcugcuguugaaguugcugcuggagcugcuucgccugcagcugcgc	X:3422130..3422179:-	0.212	0.998185	5.553	6.50576e-37	6.56	4.86649e-128	0.213	0.980053	0.124	NA	0.033	NA	-0.005	NA
3r_17853	novel	aagguuuccauggaguugcagcug	gcuguacgcgauggacuuuc	gcuguacgcgauggacuuucauuaccuagcaacaccaaaugcugcuaugguaacgggaaagguuuccauggaguugcagcug	3R:52252767..52252849:+	0.009	0.998185	-0.157	NA	0.13	NA	0.016	0.997818	0.02	NA	-0.084	NA	0	NA
x_16161	novel	uaagacuucggccaucucuguca	ucggccgguggccaagucacuaa	uaagacuucggccaucucugucacgauucggccgguggccaagucacuaa	X:24342326..24342376:-	-0.135	0.998185	0.072	0.972477	-0.07	0.987961	-0.69	0.96964	0.349	0.9774	-0.201	NA	0.034	0.984137
unkn_31317	novel	aagguuuccauggaguugcagcug	gcuguacgcgauggacuuuc	gcuguacgcgauggacuuucauuaccuagcgacaccaaaugcugcuaugguaacgggaaagguuuccauggaguugcagcug	UNKN:11636913..11636995:+	0.009	0.998185	-0.157	NA	0.13	NA	0.016	0.997818	0.02	NA	-0.084	NA	0	NA
unkn_29432	novel	aguucgcgaaggagcuggagggcac	gccaccgacuccucgagagcguuu	aguucgcgaaggagcuggagggcaccaaaaucaagcugggcuuuugcguaagcaaagucagagccgcgccaccgacuccucgagagcguuu	UNKN:7366336..7366427:+	-0.109	0.998185	-0.5	0.837417	0.197	0.987961	-0.13	0.980053	-0.041	0.9774	-0.632	NA	-0.094	NA
unkn_43714	novel	cacuguauuagcgaggcgggccccg	gggccccgucgaugagcggcccagugua	gggccccgucgaugagcggcccaguguaucuguaucccagcaucuauaaaaguuggucgaauacggcacuguauuagcgaggcgggccccg	UNKN:13071667..13071758:-	0.026	0.998185	-0.69	0.634236	-0.065	0.987961	-0.941	0.96964	-0.112	0.9774	-0.308	NA	-0.007	NA
3l_6450	novel	uggggguguagcgagcgaucg	gucguuuuugcucaccuugcagg	uggggguguagcgagcgaucgggguguauuguucccucacugucaacucucgucguuuuugcucaccuugcagg	3L:6390085..6390159:+	-0.096	0.998185	-0.312	0.912875	0.189	NA	-0.063	0.997818	0.135	NA	-0.122	NA	0.17	NA
2l_3553	novel	uucuaaggaguuuagagcgggcgca	aguuggcucuuuuuggugcg	uucuaaggaguuuagagcgggcgcaggguucuuacgacucgugaguuggcucuuuuuggugcg	2L:2299956..2300019:-	-0.001	0.998185	0.034	0.987883	0.239	0.987961	-0.013	0.997818	0.151	0.9774	-0.073	NA	0.02	NA
x_12887	novel	cggggauugaugcgcgcacuggagc	ccgagaugguacgcagcgugcccgug	cggggauugaugcgcgcacuggagcguacagcggugguagcuaccacauccaugggcgccgagaugguacgcagcgugcccgug	X:3309800..3309884:-	-0.106	0.998185	-0.291	0.912875	0.014	NA	0.105	0.980673	0.179	NA	-0.133	NA	0.048	NA
x_15704	novel	ugauaucguugcugguccaggucc	accgguacccguccugauaucggu	accgguacccguccugauaucggugccauuacugauaucguugcugguccaggucc	X:23427866..23427922:-	-0.409	0.998185	-0.137	0.923475	0.207	0.987961	0.12	0.980053	0.051	0.9774	-0.211	NA	0.489	0.720765
3l_8667	novel	gagcagcgugcgcgggcu	cccaccuccugcccga	gagcagcgugcgcgggcuggagcaguccucgaaacggaugcuguagcccaccuccugcccga	3L:17982331..17982393:-	-0.208	0.998185	0.199	0.923475	-0.147	0.987961	-0.053	0.997818	-0.071	0.9774	-0.179	NA	0.048	NA
x_15525	novel	cauugucccgucucgucuuccgcg	ugauggaugaguccagggcgguccg	cauugucccgucucgucuuccgcgaggccccgcaguauuucaucgaaaugcuccuucuugcugguggugauggaugaguccagggcgguccg	X:23359375..23359467:-	-0.204	0.998185	-0.925	0.182563	0.043	0.987961	-1.799	0.0296085	-0.348	0.9774	-0.51	NA	0.297	0.984137
2l_5312	novel	gagauaccggccucgaacuc	gcucgcgggucuguccgu	gcucgcgggucuguccguucuucgagauaccggccucgaacuc	2L:46339203..46339246:-	0.048	0.998185	0.648	0.634236	0.028	NA	0.553	0.980053	0.257	0.9774	0.385	NA	-0.014	NA
2l_4894	novel	ugcugcugcuguaccgucgag	auacagugccgcugccgagc	auacagugccgcugccgagcugguguugcugcugcugcuguaccgucgag	2L:26759152..26759202:-	-0.156	0.998185	-0.164	NA	-0.029	NA	-0.145	0.980053	-0.122	NA	0.088	NA	0.156	NA
x_12029	novel	uaucguccuguggccacuacugcca	gcagcuaugaggccggggacauc	gcagcuaugaggccggggacaucacugcuccacaguccuugcagaggguaucguccuguggccacuacugcca	X:23394474..23394547:+	0.092	0.998185	-0.277	0.923475	0.099	0.987961	-0.318	0.980053	-0.132	0.9774	-0.229	NA	-0.315	NA
3r_18952	novel	caggauuuuaaccgacuguuggcgc	uauugggcaaccuuauacggu	uauugggcaaccuuauacgguccaacguugcugcggggaccaggauuuuaaccgacuguuggcgc	3R:37595874..37595939:-	-0.363	0.998185	-0.029	0.987883	0.224	0.987961	0.343	0.980053	0.591	0.631361	-0.417	NA	0.184	0.984137
3l_7274	novel	ucacgguuggcacgagcacuguc	cgcugacucgccaaucgcaccg	ucacgguuggcacgagcacuguccacaacgcgcugacucgccaaucgcaccg	3L:36538836..36538888:+	0.037	0.998185	-0.332	0.912875	0.088	0.987961	-0.628	0.980053	0.131	0.9774	-0.11	NA	0.05	NA
3l_8728	novel	cgggccgacucguucagc	cgagcagauggacccgcu	cgagcagauggacccgcugguagcgggccgacucguucagc	3L:20836958..20836999:-	0.191	0.998185	-0.222	0.923475	0.064	NA	9.752	5.2715e-77	8.021	6.51625e-182	-0.409	NA	-0.056	NA
3l_9094	novel	uguuuggaugggucggaugagc	ucagcugcaccaauggcaac	ucagcugcaccaauggcaacugcauaccguuucaccugacgugcgacggugucaagaacuguuuggaugggucggaugagc	3L:41157859..41157940:-	-0.399	0.998185	-1.106	0.182088	-0.194	0.987961	-0.995	0.943894	0.201	0.9774	-1.447	NA	-0.077	NA
2r_24377	novel	ccacggcuacugcacgcucggcacc	ugugcgugcggcgcuggaaaa	ccacggcuacugcacgcucggcaccaguguggacugugugcgugcggcgcuggaaaa	2R:55599463..55599520:-	-0.193	0.998185	-0.046	0.987883	0.47	0.987961	-0.088	0.980053	0.323	0.9774	-0.075	NA	0.304	0.984137
2r_22982	novel	gggucugcugcugcuga	cgcagacgcggauucuu	cgcagacgcggauucuugcugcugcugcugcugcugcugcggggucugcugcugcuga	2R:10226743..10226801:-	NA	NA	-4.706	5.65034e-28	-3.425	2.16187e-28	-5.594	6.26531e-19	-3.657	1.82948e-29	-5.585	NA	-3.523	5.16965e-39
2l_4543	novel	gugggaucgggcugguuggga	ucagcgugcuggaaaucucccgccc	gugggaucgggcugguugggacuaucagcgugcuggaaaucucccgccc	2L:11921235..11921284:-	0.048	0.998185	-0.664	0.656572	-0.247	0.987961	-0.472	0.980053	0.043	0.9774	-0.543	NA	-0.092	NA
2r_23210	novel	uccccaaagagugcuguagagu	ucuauagcaccuuuuucgaac	ucuauagcaccuuuuucgaacaaauccaaugguaauuuccaaucugacuguccccaaagagugcuguagagu	2R:21867689..21867761:-	-0.19	0.998185	0.595	NA	0.202	NA	0.842	0.96964	0.103	NA	0.37	NA	0.177	NA
unkn_45741	novel	gcagacugcagcaaacgccacccuc	cggggcacggcugucugucugucu	gcagacugcagcaaacgccacccucuagcaaucgacggggcacggcugucugucugucu	UNKN:23952555..23952614:-	0.222	0.998185	-0.3	0.912875	-0.055	0.987961	-1.603	0.279748	-0.723	0.414482	-0.205	NA	-0.034	NA
x_9575	novel	cguuucaauagauugccaccgggag	aguggagguaugugaaaggagcc	aguggagguaugugaaaggagccgugaguuguugacgauaaacacucacaaggggcuuuaccguuucaauagauugccaccgggag	X:7237113..7237199:+	-0.062	0.998185	0.199	NA	0.029	NA	-0.325	0.980053	-0.003	NA	0.106	NA	0.029	NA
unkn_32044	novel	ugaaaugcacgguaguuggauaucg	auuuccaacgccauguguuuuccg	ugaaaugcacgguaguuggauaucgucauuccauuuccaacgccauguguuuuccg	UNKN:14401001..14401057:+	0.128	0.998185	0.779	0.568514	-0.017	0.987961	1.358	0.780278	-0.058	0.9774	0.634	NA	-0.215	NA
unkn_48108	novel	ugauaucguugcugguccaggucc	accgguacccguccugauaucggu	accgguacccguccugauaucggugccauuacugauaucguugcugguccaggucc	UNKN:34496430..34496486:-	-0.409	0.998185	-0.137	0.923475	0.207	0.987961	0.12	0.980053	0.051	0.9774	-0.211	NA	0.489	0.720765
2l_2247	novel	cguuucaauagauugccaccgggag	aguggagguaugugaaaggagcc	aguggagguaugugaaaggagccgugaguuguugacgauaaacacucacaaggggcuuuaccguuucaauagauugccaccgggag	2L:30163412..30163498:+	-0.062	0.998185	0.199	NA	0.029	NA	-0.325	0.980053	-0.003	NA	0.106	NA	0.029	NA
x_9189	novel	ugauaucguugcugguccaggucc	accgguacccguccugauaucggu	accgguacccguccugauaucggugccauuacugauaucguugcugguccaggucc	X:2238091..2238147:+	-0.409	0.998185	-0.137	0.923475	0.207	0.987961	0.12	0.980053	0.051	0.9774	-0.211	NA	0.489	0.720765
unkn_48463	novel	uacuaguagaagcgcggucaggacg	uccgcggcucauaguauagcgaacu	uacuaguagaagcgcggucaggacgggacgcggcguuuuuccgcggcucauaguauagcgaacu	UNKN:36345054..36345118:-	-0.177	0.998185	-0.145	0.934881	-0.592	0.588954	-0.173	0.980053	-0.341	0.9774	-0.791	0.0934893	-0.234	0.984137
2l_1926	novel	gcugcugcuguugaaguu	cuucucgcuguagccgucc	gcugcugcuguugaaguugaugcugcuucucgcuguagccgucc	2L:15478511..15478555:+	0.212	0.998185	5.555	6.50576e-37	6.56	4.86649e-128	0.213	0.980053	0.124	NA	0.033	NA	-0.005	NA
unkn_46003	novel	uaagcgguacgaggucagagguaag	ucuggguaagcggucggcgugcugcc	uaagcgguacgaggucagagguaagcguuaagaguaugcguucuggguaagcggucggcgugcugcc	UNKN:24734378..24734445:-	0.088	0.998185	-0.366	0.894608	0.04	NA	-0.005	0.997818	-0.027	NA	-0.17	NA	0.119	NA
unkn_38305	novel	ugaaaucggcggugggaguugcgg	guggcccgagcggcgguggaaacg	ugaaaucggcggugggaguugcgguggaaacggugguggcccgagcggcgguggaaacg	UNKN:1936276..1936335:-	0.142	0.998185	-0.382	0.894608	0.259	0.987961	-0.124	0.980053	0.036	0.9774	-0.108	NA	-0.065	NA
unkn_26875	novel	cguuucaauagauugccaccgggag	aguggagguaugugaaaggagcc	aguggagguaugugaaaggagccgugaguuguugacgauaaacacucacaaggggcuuuaccguuucaauagauugccaccgggag	UNKN:3167756..3167842:+	-0.062	0.998185	0.199	NA	0.029	NA	-0.325	0.980053	-0.003	NA	0.106	NA	0.029	NA
2r_20933	novel	ugagcgccgcgucugaguucugc	auaacccuguaguaugugcaagc	auaacccuguaguaugugcaagcaaugcugagcgccgcgucugaguucugc	2R:44703734..44703785:+	-0.005	0.998185	-0.59	0.798594	0.107	0.987961	-1.032	0.96964	0.036	0.9774	-0.702	NA	0.066	NA
3l_7363	novel	cgggguaggguuguuuagggcggcu	caaaacguaagcgagcguggagcaacgac	caaaacguaagcgagcguggagcaacgacgacgggguaggguuguuuagggcggcu	3L:39977682..39977738:+	0.051	0.998185	-0.658	0.634236	-0.005	NA	-0.495	0.980053	0.117	NA	-0.606	NA	-0.09	NA
3l_5727	novel	cguuucaauagauugccaccgggag	aguggagguaugugaaaggagcc	aguggagguaugugaaaggagccgugaguuguugacgauaaacacucacaaggggcuuuaccguuucaauagauugccaccgggag	3L:1189306..1189392:+	-0.062	0.998185	0.199	NA	0.029	NA	-0.325	0.980053	-0.003	NA	0.106	NA	0.029	NA
unkn_41660	novel	uaucguccuguggccacuacugcca	gcagcuaugaggccggggacauc	gcagcuaugaggccggggacaucacugcuccacaguccuugcagaggguaucguccuguggccacuacugcca	UNKN:8110347..8110420:-	0.092	0.998185	-0.277	0.923475	0.099	0.987961	-0.318	0.980053	-0.132	0.9774	-0.229	NA	-0.315	NA
2l_2772	novel	caggauuuuaaccgacuguuggcgc	uauugggcaaccuuauacggu	uauugggcaaccuuauacgguccaacguugcugcggggaccaggauuuuaaccgacuguuggcgc	2L:134627..134692:-	-0.363	0.998185	-0.029	0.987883	0.224	0.987961	0.343	0.980053	0.591	0.631361	-0.417	NA	0.184	0.984137
2l_5027	novel	cggggcgggcuggcggga	ccgugcgugaaccgaa	cggggcgggcuggcgggauugcaacaccgugcgugaaccgaa	2L:34774009..34774051:-	0.158	0.998185	-0.36	0.89609	0.053	NA	-1.372	0.780278	0.13	NA	-0.396	NA	-0.089	NA
3r_17051	novel	uuuagaggcuuagcugaugguuccu	gagcuggaggaagauuuucucgagugg	gagcuggaggaagauuuucucgaguggcuuguugcaaugguagagacuuuuagaggcuuagcugaugguuccu	3R:34665998..34666071:+	-0.641	0.998185	0.479	0.894608	0.383	0.987961	-0.166	0.980053	0.199	0.9774	-0.258	NA	0.343	NA
3r_17050	novel	uuguagcacucucguuguuugggcc	cccagccuagggcgcuuuucacagcg	uuguagcacucucguuguuugggccguagauggcccagccuagggcgcuuuucacagcg	3R:34664408..34664467:+	-0.104	0.998185	0.062	0.973294	-0.08	0.987961	-0.125	0.980053	0.028	0.981077	-0.272	NA	-0.145	0.984137
unkn_32534	novel	ugagcgcugagaauccucauggccc	gccugucguucucguucucucu	ugagcgcugagaauccucauggccccgcggccugucguucucguucucucu	UNKN:17096501..17096552:+	-0.697	0.998185	-0.392	0.837417	0.088	0.987961	-0.925	0.831897	-0.587	0.690867	-0.827	NA	0.14	0.984137
unkn_38705	novel	cacgaaccugcugcagcauguacug	gugcggcggcccaggac	cacgaaccugcugcagcauguacugugcauuugccuuucgacugaguguaagucgcaacaacgacuugcuggugcggcggcccaggac	UNKN:2486513..2486601:-	-0.173	0.998185	0.565	0.837417	0.239	0.987961	0.698	0.980053	0.12	0.9774	0.311	NA	0.179	NA
2l_3049	novel	ugcauguugauuugcugauugg	aaguggcagacgauuugccagc	ugcauguugauuugcugauuggcgaccaaguggcagacgauuugccagc	2L:578471..578520:-	0.19	0.998185	0.014	NA	0.039	NA	0.347	0.980053	0.356	0.9774	0.229	NA	-0.068	NA
x_10907	novel	gaacucgucaaggaucgccgau	cgagacaugacgaagcgggcu	cgagacaugacgaagcgggcucgcuugcgccucccacgaggagaagcggaacucgucaaggaucgccgau	X:21417477..21417547:+	-0.223	0.998185	-0.153	0.934881	-0.373	0.987961	0.405	0.980053	-0.09	0.9774	0.145	NA	-0.001	NA
unkn_34108	novel	ugagaggccuagugccagcacggcg	agguggagcgcaucgccaccaag	ugagaggccuagugccagcacggcgcagaaccccacaucacugccacagguggagcgcaucgccaccaag	UNKN:25054511..25054581:+	0.329	0.998185	0.251	0.923475	-0.113	0.987961	-0.314	0.980053	0.054	0.9774	0.287	NA	-0.155	NA
x_11972	novel	caacagcuuuggcgugaggacgagc	ucaaucuccaggcacaccuugca	caacagcuuuggcgugaggacgagcugcagcucaaucuccaggcacaccuugca	X:23361430..23361484:+	0.153	0.998185	-0.106	0.957644	-0.025	0.987961	0.168	0.980053	-0.211	0.9774	-0.114	NA	-0.071	NA
2l_975	novel	caggguguuacgaaugcuuggc	cauucauuuggaacaucaagca	cauucauuuggaacaucaagcagagcaucgaaaaccugcaggguguuacgaaugcuuggc	2L:2801356..2801416:+	-0.014	0.998185	-0.236	NA	-0.101	NA	-0.387	0.980053	0.018	NA	-0.235	NA	-0.087	NA
unkn_34014	novel	uaauucguucgccggcggcugugcc	cagacgcgaacggagcaaacc	uaauucguucgccggcggcugugccugaaccgucaagggagcaggaggcuuugccuggaccgucaagggcgccagacgcgaacggagcaaacc	UNKN:24734916..24735009:+	-0.296	0.998185	-0.072	0.973294	0.151	NA	0.178	0.980053	0.157	0.9774	-0.174	NA	0.083	NA
2r_22798	novel	gaugcugcugcuguuga	guucccgcggacgacgaagg	guucccgcggacgacgaaggcugcuguugcugcugaugcugcugcuguuga	2R:2639289..2639340:-	NA	NA	3.535	1.30137e-13	3.406	7.63684e-28	NA	NA	NA	NA	NA	NA	NA	NA
unkn_38992	novel	cagguucuuuucggccauggcuguu	cagcauggcuggacaggaaacauggu	cagcauggcuggacaggaaacaugguuaugugaacuacuuugucacccagguucuuuucggccauggcuguu	UNKN:3078366..3078438:-	-0.303	0.998185	-0.002	0.999111	0.164	0.987961	-0.476	0.980053	0.083	0.9774	-0.086	NA	-0.111	NA
2l_3482	novel	gccacuagucugcagccggagc	ucgcagcggaaugagcguggucc	ucgcagcggaaugagcguggucccgccccucgacugagccguucuaagccguccggagccacuagucugcagccggagc	2L:2152641..2152720:-	-0.121	0.998185	0.484	0.870019	-0.002	NA	-0.14	0.980053	0.041	NA	-0.017	NA	0.034	NA
3r_17997	novel	ggggauauaacgagccgguggcagu	ugcuaauuggucuggauaacgcgagccu	ugcuaauuggucuggauaacgcgagccuagguuuugcaacgaaaagccuagaagggggauauaacgagccgguggcagu	3R:52799291..52799370:+	-0.019	0.998185	-0.33	NA	0.076	NA	-0.637	0.980053	0.106	NA	-0.295	NA	-0.108	NA
3l_6063	novel	uaccggaggacgcagcaaaauuga	gauagucaagccauuccggauggc	gauagucaagccauuccggauggcaacgguguuaccggaggacgcagcaaaauuga	3L:4512935..4512991:+	-0.345	0.998185	0.212	NA	-0.067	NA	0.11	0.980053	0.036	NA	-0.115	NA	-0.014	NA
2l_4551	novel	uccuguagaacuugcgaguuucccc	ggauagcaacugcugcaugagu	uccuguagaacuugcgaguuucccccgauugggauagcaacugcugcaugagu	2L:12551360..12551413:-	-0.138	0.998185	-0.002	0.999111	0.524	0.802114	-1.067	0.831897	-0.94	0.0496942	-0.247	NA	0.306	0.984137
unkn_35905	novel	cagguucuuuucggccauggcuguu	cagcauggcuggacaggaaacauggu	cagcauggcuggacaggaaacaugguuaugugaacuacuuugucacccagguucuuuucggccauggcuguu	UNKN:33228391..33228463:+	-0.303	0.998185	-0.002	0.999111	0.164	0.987961	-0.476	0.980053	0.083	0.9774	-0.086	NA	-0.111	NA
unkn_38786	novel	uguacgggaauacgaagucgagacc	ucucgguguuccuccggugu	ucucgguguuccuccgguguccuuuaggcgacuaugaugucaucgauguacgggaauacgaagucgagacc	UNKN:2555492..2555563:-	-0.087	0.998185	-0.038	0.987883	0.047	0.987961	0.282	0.980053	-0.05	0.9774	-0.092	NA	-0.162	0.984137
2l_2661	novel	gaaggaucagcaucggacagggaa	ggcugggacugcuccuucu	ggcugggacugcuccuucugcuccagugacgucuccaggguaggcuucuugggugaaggaucagcaucggacagggaa	2L:48692368..48692446:+	-0.627	0.998185	0.12	0.934881	0.029	0.987961	-0.143	0.980053	0.103	0.9774	-0.876	NA	0.249	0.984137
aga-mir-281	known	aagagagcuauccgucgacagu	ugucauggaauugcucucuuuau	aagagagcuauccgucgacaguagggauauaauucacugucauggaauugcucucuuuau	2L:17362443..17362503:-	0.174	0.998185	0.643	0.568514	0.066	0.987961	0.093	0.980053	-0.098	0.9774	0.473	0.402225	-0.196	0.984137
aga-mir-184	known	uggacggagaacugauaagggc	ccuuaucauucuuucgccccgu	ccuuaucauucuuucgccccgugugcuuucuaacaacuggacggagaacugauaagggc	3R:42632369..42632428:+	0.2	0.998185	-0.5	0.656572	0.19	0.987961	-0.099	0.980053	0.011	0.990627	-0.369	0.517182	-0.022	0.984137
aga-mir-263a	known	aauggcacuggaagaauucacggg	cguguucucuuaguggcauacc	aauggcacuggaagaauucacgggauuuuuuucaacauucccguguucucuuaguggcauacc	3R:12395488..12395551:+	-0.002	0.998185	-0.401	0.837417	0.046	0.987961	0.002	0.997818	-0.149	0.9774	-0.337	0.528907	-0.025	0.984137
aga-mir-8	known	caucuuaccgggcagcauuaga	uaauacugucagguaaagauguc	caucuuaccgggcagcauuagauauguuaucggauauuucuaauacugucagguaaagauguc	3L:38943057..38943120:+	0.207	0.998185	0.226	0.89609	-0.297	0.987961	-0.652	0.943894	0.143	0.9774	0.006	0.983127	-0.243	0.984137
aga-mir-306	known	ucagguacuggaugacucucag	ugagggccuucugguaccuacc	ucagguacuggaugacucucaguuguguguaaaagaugcugagggccuucugguaccuacc	3R:5888606..5888667:-	0.038	0.998185	0.194	0.923475	0.199	0.987961	-0.381	0.980053	-0.219	0.9774	0.272	0.627113	0.096	0.984137
aga-mir-317	known	ugaacacaucuggugguaucucagu	ugggauacuccuugugcucgcu	ugggauacuccuugugcucgcugugcauaucgauucaaacuagugaacacaucuggugguaucucagu	2R:28252006..28252074:-	-0.408	0.998185	0.348	0.894608	-0.911	0.0474093	0.283	0.980053	-0.035	0.9774	0.304	0.637146	-0.046	0.984137
aga-mir-92b	known	aauugcacuugucccggccugc	aggacgugacaggugcauuauuug	aggacgugacaggugcauuauuugcugauuuucaaugucaaauugcacuugucccggccugc	2R:39200620..39200682:+	0.146	0.998185	-0.724	0.132803	0.012	0.987961	-0.948	0.439245	-0.129	0.9774	-0.396	0.494849	-0.062	0.984137
aga-let-7	known	ugagguaguugguuguauagu	cuauacaauccgcuaacuuacc	ugagguaguugguuguauaguaccgugguuccaauacucgacuauacaauccgcuaacuuacc	3R:10270720..10270783:-	0.228	0.998185	-0.33	0.894608	-0.385	0.987961	-0.666	0.96964	-0.543	0.631361	0.089	0.871494	-0.206	0.984137
aga-mir-275	known	ucagguaccugaaguagcgcgc	cgcgcuaagcaggaaccgggacu	cgcgcuaagcaggaaccgggacuugguacacauucgcuagcagucagguaccugaaguagcgcgc	3R:38377358..38377423:+	-0.08	0.998185	-0.021	0.987883	-0.224	0.987961	-0.234	0.980053	-0.172	0.9774	0.08	0.871494	-0.073	0.984137
aga-mir-10	known	acccuguagauccgaauuuguu	caaauucgguucuagagagguuu	acccuguagauccgaauuuguuugaauuuauauuaauaacaaauucgguucuagagagguuu	2R:59711783..59711845:-	0.188	0.998185	0.419	0.837417	0.076	0.987961	0.154	0.980053	-0.106	0.9774	0.427	0.474747	-0.221	0.984137
aga-mir-100	known	aacccguagauccgaacuugug	caagaacggauauaugggauuc	aacccguagauccgaacuugugcugcacuguacaacuggacacaagaacggauauaugggauuc	3R:10274690..10274754:-	0.303	0.998185	0.269	0.89609	-0.127	0.987961	0.102	0.980053	-0.088	0.9774	0.281	0.625065	-0.37	0.984137
aga-mir-34	known	uggcagugugguuagcugguugu	cagccacuauccgcccugccguc	uggcagugugguuagcugguugugugguuuucccaucuucacagccacuauccgcccugccguc	2R:28232676..28232740:-	0.374	0.998185	-0.251	0.894608	0.019	0.987961	-0.043	0.997818	-0.047	0.9774	-0.076	0.871494	-0.193	0.984137
aga-mir-970	known	ucauaagacacacgcggcuau	agccagcguuuguuuuauuuggua	agccagcguuuguuuuauuugguauguuacuacugcugcaagcuauaucauaagacacacgcggcuau	X:112035..112103:-	0.121	0.998185	-0.212	0.912875	-0.163	0.987961	0.131	0.980053	-0.048	0.9774	0.064	0.871494	0.015	0.984137
aga-mir-305	known	cggcacauguuggaguacacucu	auuguacuucaucaggugcuc	auuguacuucaucaggugcucugguggauuugagaaaacccggcacauguuggaguacacucu	3R:38386259..38386322:+	0.047	0.998185	0.209	0.923185	-0.003	0.991571	0.431	0.980053	0.378	0.9774	-0.106	NA	-0.22	0.984137
aga-bantam	known	ugagaucacuuugaaagcugau	ccgguuuucauuuucgaucugacu	ccgguuuucauuuucgaucugacuuauuuuuuucacaaacaagugagaucacuuugaaagcugau	2R:33274523..33274588:+	0.017	0.998185	0.191	0.923475	-0.223	0.987961	-0.538	0.96964	0.343	0.9774	-0.391	0.494849	-0.244	0.984137
aga-mir-252	known	cuaaguacuagugccgcaggag	ccugcugcccaagugcuuaucg	cuaaguacuagugccgcaggagagauucuaaccccugcugcccaagugcuuaucg	2R:52693316..52693371:-	0.267	0.998185	0.033	0.987883	-0.081	0.987961	0.005	0.997818	-0.108	0.9774	0.376	0.494849	-0.021	0.984137
aga-mir-9c	known	ucuuugguauucuagcuguaga	uaaagcuuuaguaccagagguc	ucuuugguauucuagcuguagaauguuguuuucauuguaauaucucuaaagcuuuaguaccagagguc	3R:5891176..5891244:-	0.171	0.998185	0.849	0.0491309	0.35	0.987961	0.001	0.997818	0.275	0.9774	0.433	0.424029	-0.067	0.984137
aga-mir-1175	known	aaguggaguaguggucucaucgcu	ugagauucuacuucuccgacu	aaguggaguaguggucucaucgcuuagcuucagaaaagugagauucuacuucuccgacu	2R:9129795..9129854:+	0.341	0.998185	0.698	0.568514	0.062	0.987961	0.725	0.943894	0.269	0.9774	0.45	NA	-0.122	0.984137
aga-mir-125	known	ucccugagacccuaacuuguga	acaaguuuugaucuccgguau	ucccugagacccuaacuugugacuaucguugcaaaguuucacaaguuuugaucuccgguau	3R:10270181..10270242:-	0.012	0.998185	0.066	0.972477	0.217	0.987961	-0.845	0.831897	-0.569	0.631361	-0.068	0.871494	-0.022	0.984137
aga-mir-957	known	ugaaaccguccaaaacugaggc	guuaguuuugggcggguuuuagu	guuaguuuugggcggguuuuaguguauuucgaugagaauucuauugaaaccguccaaaacugaggc	3L:14911241..14911307:+	0.199	0.998185	0.497	0.634236	0.053	0.987961	0.412	0.980053	0.125	0.9774	0.611	0.243875	-0.016	0.984137
aga-chr2r_57695	known	guaggccggcggaaacuacuugc	agggguuucuuucggcc	agggguuucuuucggccuccagcagcauuugaccguuguaggccggcggaaacuacuugc	2R:22427283..22427343:+	0.203	0.998185	0.146	0.923475	-0.138	0.987961	0.065	0.980673	0.007	0.990627	0.317	0.528907	0.016	0.984137
aga-mir-11	known	caucacagucugaguucuugcu	caagaacuuggaacugugaucugug	caagaacuuggaacugugaucugugugguuauuagccgcguucgaagcucuucacaucacagucugaguucuugcu	2R:13042029..13042105:+	0.178	0.998185	0.525	0.568514	0.116	0.987961	-0.024	0.997818	0.088	0.9774	0.352	0.517182	-0.194	0.984137
aga-mir-10360	known	uaguugagaagacgcugagccgccc	uggacuuggcuuauccugcacuacgguu	uaguugagaagacgcugagccgccccgucuugugcuuggugcuuuagauuuggccguuugggguggacuuggcuuauccugcacuacgguu	2R:52133139..52133230:-	-0.015	0.998185	-0.135	0.923475	0.019	0.987961	0.057	0.980673	0.198	0.9774	-0.123	0.838328	-0.021	0.984137
aga-mir-10360	known	uaguugagaagacgcugagccgccc	uggacuuggcuuauccugcacuacgguu	uaguugagaagacgcugagccgccccgucuugugcuuggugcuuuagauuuggcuguuugggguggacuuggcuuauccugcacuacgguu	UNKN:3596435..3596526:-	-0.015	0.998185	-0.135	0.923475	0.019	0.987961	0.057	0.980673	0.198	0.9774	-0.123	0.838328	-0.021	0.984137
aga-chrx_353716	known	gucgacagagagauaaaucacu	ugguuuaucuagucugucgaaac	ugguuuaucuagucugucgaaacaagugaauuugcaaaagucuugucgacagagagauaaaucacu	X:2840459..2840525:-	-0.192	0.998185	0.3	0.894608	-0.759	0.136785	-0.184	0.980053	-0.139	0.9774	0.237	0.6556	-0.374	0.984137
aga-mir-133	known	uugguccccuucaaccagcugu	agcugguugacaucgggucaaau	agcugguugacaucgggucaaaucguaauauuguugacgcaauauuuucccuuugcgaaugcauuugguccccuucaaccagcugu	3R:15075208..15075294:-	0.21	0.998185	0.198	0.923475	0.013	0.987961	-1.03	0.831897	-0.703	0.371284	0.451	0.413047	-0.01	0.984137
aga-mir-9b	known	acuuuggugauuuuagcuguaug	uauagcuuuaucaccaaaaacc	acuuuggugauuuuagcuguauguugaaugcauuccuaaccacauauagcuuuaucaccaaaaacc	3R:5887798..5887864:-	0.049	0.998185	0.511	0.568514	0.176	0.987961	0.171	0.980053	0.193	0.9774	0.186	0.719421	-0.166	0.984137
aga-mir-999	known	uguuaacuguaagacugugucu	acgcggucaugcagucuaauauu	acgcggucaugcagucuaauauuuggcauucgauucaaauguuaacuguaagacugugucu	2R:8265179..8265240:-	0.149	0.998185	0.297	0.894608	0.097	0.987961	-0.444	0.980053	0.19	0.9774	-0.105	0.871494	-0.166	0.984137
aga-mir-2-2	known	ucacagccagcuuugaugagc	cucucaaaguggcugugaaaug	cucucaaaguggcugugaaauggugcacuuucgauccgauaucucauaucacagccagcuuugaugagc	2L:37757109..37757178:-	-0.007	0.998185	-0.131	0.934881	-0.017	0.987961	0.376	0.980053	0.082	0.9774	0.218	0.696891	0.137	0.984137
aga-mir-263b	known	cuuggcacugggagaauucacag	guggaucuuuucgugccaucgu	cuuggcacugggagaauucacaguggaucguaccauaucguuucuguggaucuuuucgugccaucgu	2L:17784458..17784525:+	0.343	0.998185	-0.42	0.837417	-0.201	0.987961	-1.133	0.397231	-0.519	0.830615	-0.08	0.871494	0.04	0.984137
aga-mir-2-2	known	ucacagccagcuuugaugagc	ucaucaaacuugguuguuguagc	ucaucaaacuugguuguuguagcuugcuuugauaguugcuaucacagccagcuuugaugagc	2L:37758715..37758777:-	-0.007	0.998185	-0.131	0.934881	-0.017	0.987961	0.376	0.980053	0.082	0.9774	0.218	0.696891	0.137	0.984137
aga-mir-980	known	cggucguucauuaggucaucuagc	uagcugccuagugaagggc	cggucguucauuaggucaucuagcuaaauuuuacuaagcuagcugccuagugaagggc	2R:21985898..21985956:-	-0.504	0.998185	-1.024	0.018965	-0.428	0.987961	-0.482	0.978322	-0.689	0.27527	-1.048	0.0454919	-0.411	0.984137
aga-mir-9a	known	ucuuugguuaucuagcuguauga	uaaagcuagcauaccgaaguua	ucuuugguuaucuagcuguaugaguguauuuuaaacgucauaaagcuagcauaccgaaguua	2L:15089298..15089360:-	0.262	0.998185	0.409	0.798594	0.133	0.987961	-0.286	0.980053	0.056	0.9774	0.028	0.953131	-0.344	0.984137
aga-mir-927	known	uuuagaauuccuacgcuuuacc	caaagcguuuggauucugaaa	uuuagaauuccuacgcuuuacccgugauuaaaguagugcggcaaagcguuuggauucugaaa	X:18737382..18737444:+	0.113	0.998185	0.505	0.634236	-0.061	0.987961	0.575	0.96964	0.206	0.9774	0.417	NA	-0.107	0.984137
aga-chr3r_160384	known	ugacuagaggcagacucguuugg	agcgagucugcacucuggaauaacaug	agcgagucugcacucuggaauaacaugucggauucguauacucaugacuagaggcagacucguuugg	3R:10314330..10314397:-	0.251	0.998185	0.702	0.275514	-0.034	0.987961	0.517	0.96964	0.109	0.9774	0.596	NA	-0.124	0.984137
aga-mir-1891	known	acacguccauuaacucugguac	ugaggaguuaauuugcguguuu	ugaggaguuaauuugcguguuuuuauauuugauuaaacacguccauuaacucugguac	3R:5819058..5819116:-	0.159	0.998185	0.429	0.837417	-0.217	0.987961	0.186	0.980053	-0.341	0.9774	0.382	NA	-0.257	0.984137
aga-mir-92a	known	uauugcacuugucccggccuau	cggccggcucaagagcaaaauu	cggccggcucaagagcaaaauuguguuucauacuaauauugcacuugucccggccuau	2R:39181128..39181186:+	0.43	0.998185	-0.181	0.923475	-0.032	0.987961	0.674	0.96964	-0.37	0.9774	0.03	NA	-0.227	0.984137
aga-mir-286b	known	ugacuagaccgaacacucguauc	gcgaaugucggaguagucgcu	gcgaaugucggaguagucgcuugugauugaauugacaaaaagugacuagaccgaacacucguauc	2L:3537482..3537547:-	1.106	0.38352	-0.349	0.894608	-0.42	0.987961	-0.297	0.980053	-0.491	0.972373	0.746	0.340162	-0.17	0.984137
aga-mir-375	known	uuuguucguuuggcucgaguua	acuuaagccacgcguacagaaacu	acuuaagccacgcguacagaaacuuuuuagaaugaaagaguuuguucguuuggcucgaguua	UNKN:24166025..24166087:-	0.372	0.998185	0.191	0.923475	-0.132	0.987961	-0.2	0.980053	0.079	0.9774	0.348	NA	-0.122	0.984137
aga-mir-375	known	uuuguucguuuggcucgaguua	acuuaagccacgcguacagaaacu	acuuaagccacgcguacagaaacuuuuuagaaugaaagaguuuguucguuuggcucgaguua	3R:51640580..51640642:-	0.372	0.998185	0.191	0.923475	-0.132	0.987961	-0.2	0.980053	0.079	0.9774	0.348	NA	-0.122	0.984137
aga-mir-10381	known	uugggcgcuaucuacaauguag	acauuguagaaagggucaaaauga	acauuguagaaagggucaaaaugauauaauuucugcauuucauugggcgcuaucuacaauguag	X:1722549..1722613:+	0.484	0.998185	0.693	0.568514	0.359	0.987961	-0.435	0.980053	-0.171	0.9774	0.678	NA	-0.293	0.984137
aga-mir-10381	known	uugggcgcuaucuacaauguag	acauuguagaaagggucaaaauga	acauuguagaaagggucaaaaugauauaauuucugcauuucauugggcgcuaucuacaauguag	X:1724402..1724466:+	0.484	0.998185	0.693	0.568514	0.359	0.987961	-0.435	0.980053	-0.171	0.9774	0.678	NA	-0.293	0.984137
aga-mir-10381	known	uugggcgcuaucuacaauguag	acauuguagaaagggucaaaauga	acauuguagaaagggucaaaaugauauaauuucugcuuuucauugggcgcuaucuacaauguag	X:1723256..1723320:+	0.484	0.998185	0.693	0.568514	0.359	0.987961	-0.435	0.980053	-0.171	0.9774	0.678	NA	-0.293	0.984137
aga-mir-965-1	known	aggggaaugcuguacacucuaug	uaagcguauagcuuuucccauu	aggggaaugcuguacacucuaugugcuaaaaauauccauaagcguauagcuuuucccauu	3R:11096192..11096252:+	0.071	0.998185	0.111	NA	-0.066	NA	NA	NA	-0.034	NA	0.086	NA	-0.089	NA
aga-mir-965-1	known	aggggaaugcuguacacucuaug	uaagcguauagcuuuucccauu	aggggaaugcuguacacucuaugugcuaaaaauauccauaagcguauagcuuuucccauu	3R:11101711..11101771:+	0.071	0.998185	0.111	NA	-0.066	NA	NA	NA	-0.034	NA	0.086	NA	-0.089	NA
aga-chr3l_119935	known	uagcaccauucgaaaucaguac	acuggcuuccuaucggugcuuag	acuggcuuccuaucggugcuuagauggcauaugaaaucguucuagcaccauucgaaaucaguac	3L:39242665..39242729:+	-0.096	0.998185	0.046	0.987883	0.186	0.987961	0.428	0.980053	0.005	0.990627	0.029	NA	0.064	0.984137
aga-mir-283	known	aaauaucagcugguaauucuaggc	cgggauuucagcugauaucca	aaauaucagcugguaauucuaggcuaucaauccaucgugcaucccgggauuucagcugauaucca	2R:37890046..37890111:-	0.181	0.998185	0.115	0.934881	-0.204	0.987961	0.021	0.997818	0.04	0.9774	0.115	NA	-0.242	0.984137
aga-chr3r_170007	known	gaaggaacucccggugugauaug	uaucacagcaguaguuaccuacu	gaaggaacucccggugugauaugugaacaguaaagcguuaucgcccauaucacagcaguaguuaccuacu	2L:3537281..3537351:-	1.153	0.38352	-0.21	0.923475	-0.503	0.987961	-0.111	0.980053	-0.474	0.9774	0.675	NA	-0.27	0.984137
aga-mir-315	known	uuuugauuguugcucagaaagcc	cuuucgggcaguaaucaaaguc	uuuugauuguugcucagaaagccgugucgauuaagcaauucgcuuucgggcaguaaucaaaguc	2R:33703170..33703234:+	-0.077	0.998185	0.398	0.837417	-0.108	0.987961	-0.474	0.980053	0.415	0.9774	-0.472	NA	-0.131	0.984137
aga-chr3r_170007	known	gaaggaacucccggugugauaug	uaucacagcgguaguuaccug	gaaggaacucccggugugauauguuggaaaauccguaccauaucacagcgguaguuaccug	3R:43009066..43009127:-	1.153	0.38352	-0.21	0.923475	-0.503	0.987961	-0.111	0.980053	-0.474	0.9774	0.675	NA	-0.27	0.984137
aga-mir-278	known	acggacgauagucuucaacgacc	ucggugggacuuucguccguu	acggacgauagucuucaacgaccguuccguuugacacgaggucggugggacuuucguccguu	3L:34112629..34112691:-	-0.065	0.998185	1.037	0.199185	-0.005	0.991571	0.719	0.96964	0.182	0.9774	0.377	NA	-0.084	NA
aga-mir-932	known	ucaauuccguagugcauugcagu	ugcaagcauugugggagugaag	ucaauuccguagugcauugcaguguagaacgguuacaagcacgacugcaagcauugugggagugaag	2R:15199831..15199898:+	0.124	0.998185	0.672	0.568514	-0.059	0.987961	0.241	0.980053	0.058	0.9774	0.691	NA	0.111	0.984137
aga-mir-33	known	caguacuucugcaaugcaaccc	gugcauuguaguugcauugca	gugcauuguaguugcauugcacuuaccguguuggcaacaggugcaguacuucugcaaugcaaccc	X:1256013..1256078:-	-0.143	0.998185	0.207	0.923475	-0.09	0.987961	0.443	0.980053	-0.351	0.9774	0.486	NA	0.098	0.984137
aga-chr2r_55451	known	uagcaccaugagauucagcuc	gcugaacucucgugggucugc	gcugaacucucgugggucugcaguauuuacaagcggccacaucguucauguagcaccaugagauucagcuc	2R:13042401..13042472:+	-0.204	0.998185	0.158	0.934881	0.47	0.987961	0.887	0.96964	0.035	0.9774	0.011	NA	0.186	NA
aga-mir-87	known	gugagcaaauauucaggugugu	ccagccugaaauuugcuaaaccu	ccagccugaaauuugcuaaaccugauacguguucgaaaccaaggugagcaaauauucaggugugu	X:261193..261258:-	0.462	0.998185	0.561	0.671014	-0.264	0.987961	0.278	0.980053	-0.179	0.9774	0.848	NA	-0.33	0.984137
aga-mir-279	known	ugacuagauccacacucauuaa	aaugggugugaaucuagugauuuca	aaugggugugaaucuagugauuucacaugaauuuucgauugugacuagauccacacucauuaa	2R:55573338..55573401:-	0.01	0.998185	0.065	0.973294	-0.379	0.987961	0.334	0.980053	0.055	0.9774	0.652	NA	0.004	0.999308
aga-mir-309	known	ucacugggcaaaguuugucgca	cgacuaacuucguucaggugaug	cgacuaacuucguucaggugauguucauuaagcaaaauuccaucacugggcaaaguuugucgca	2L:3536900..3536964:-	0.944	0.643239	0.408	0.885312	-0.344	0.987961	0.393	0.980053	-0.229	0.9774	1.01	NA	-0.261	0.984137
aga-mir-124	known	gguguucacuguaggccuguaug	uaaggcacgcggugaaugcc	gguguucacuguaggccuguauguucuauugcggauuucauaaggcacgcggugaaugcc	3R:29001991..29002051:+	-0.064	0.998185	0.539	0.837417	0.117	0.987961	1.332	0.397231	0.158	0.9774	0.089	NA	0.047	NA
aga-mir-981	known	uucguugucgacgaaaccugca	cggguuucgcuggcuaacguguu	cggguuucgcuggcuaacguguugugcgagcgagcaaaaaaaacuucaauucguugucgacgaaaccugca	X:1228299..1228370:+	0.12	0.998185	0.693	0.568514	-0.083	0.987961	0.77	0.96964	-0.069	0.9774	0.672	NA	0	0.999308
aga-mir-190	known	agauauguuugauauucuugguug	cccaggaaucaaacauauuauua	agauauguuugauauucuugguuguuaagauuucaauuaucacccaggaaucaaacauauuauua	2L:46755784..46755849:-	-0.267	0.998185	-0.169	0.923475	-0.003	0.991571	-0.975	0.831897	-0.007	0.990627	-0.649	NA	-0.044	0.984137
aga-mir-13b	known	uaucacagccauuuugacgaguu	ucguaaaaaugguugugccgug	ucguaaaaaugguugugccgugucgauuuaagaaaaguucauaucacagccauuuugacgaguu	2L:37757579..37757643:-	0.049	0.998185	0.045	0.987883	-0.189	0.987961	-0.008	0.997818	-0.037	0.9774	0.022	NA	-0.184	NA
aga-mir-988	known	ccccuuguugcaaaccucacgc	guguguuuugugacaaugagau	guguguuuugugacaaugagauuuaauaguuuaaguucauccccuuguugcaaaccucacgc	2L:39359078..39359140:+	0.493	0.998185	0.249	0.923475	0.084	0.987961	-0.908	0.96964	-1.071	0.0254714	0.421	NA	-0.144	0.984137
aga-mir-10376	known	cgugguacucuugugguaagga	ucuaucauuugaguaccauga	cgugguacucuugugguaaggaguuucgcacuagcggcggcaccaagcaucucuaucauuugaguaccauga	2R:18852637..18852709:-	-0.07	0.998185	0.178	0.923475	-0.151	NA	-0.228	0.980053	0.045	NA	-0.084	NA	-0.146	NA
aga-mir-1000	known	auauuguccugucacagcagu	cuguuguuucgggacauuucca	auauuguccugucacagcaguacuuuuugccuaguuuacuguuguuucgggacauuucca	2R:13241778..13241838:+	0.308	0.998185	0.537	0.837417	-0.073	0.987961	0.517	0.980053	0.069	0.9774	0.806	NA	-0.002	NA
aga-mir-10361b	known	acacgauaagaggacaguuuacg	uaaauggucuuuuuaucguguac	acacgauaagaggacaguuuacguuucaaucggauguucguaaauggucuuuuuaucguguac	X:1722052..1722115:+	0.516	0.998185	0.386	0.894608	0.389	0.987961	-0.468	0.980053	-0.199	0.9774	0.56	NA	-0.235	NA
aga-chr2l_32652	known	ccggugaacugcugugcaggggcgc	cgcgcuugggccgcucagccgguacgg	cgcgcuugggccgcucagccgguacggcugcacaggggcgaccguguugucgcugccggugaacugcugugcaggggcgc	2L:2780434..2780514:-	0.085	0.998185	0.622	0.634236	-0.02	0.987961	0.676	0.96964	0.073	0.9774	0.781	NA	0.052	0.984137
aga-chr3r_158076	known	ccuugaucguguucgcuacugcu	uaguacgaauacguacgagggau	ccuugaucguguucgcuacugcuaugaugcuuuguaaaguaguacgaauacguacgagggau	3R:506933..506995:-	-0.053	0.998185	-0.033	NA	-0.033	NA	0.491	0.980053	0.047	NA	-0.101	NA	0	NA
aga-chr3l_120666	known	aacgaguuucccgauacgacug	gccguaucggagaaaucguucguu	aacgaguuucccgauacgacugcaagaguugguugaacacaaucagccguaucggagaaaucguucguu	3L:41925854..41925923:+	0.209	0.998185	0.437	0.894608	0.161	0.987961	0.401	0.980053	-0.065	0.9774	0.598	NA	0.182	NA
aga-mir-993	known	gaagcucguuucuauagagguauc	uacccuguaguuccgggcuuuu	uacccuguaguuccgggcuuuuguggguugaaauauuauacauauauaaucucauauacgcuuaucagaagcucguuucuauagagguauc	2R:59284615..59284706:-	0.073	0.998185	0.265	0.923475	0.034	0.987961	0.113	0.980053	-0.055	0.9774	0.138	NA	-0.244	NA
aga-mir-219	known	agaguugugacuggacauccgug	ugauuguccaaacgcaauucuug	ugauuguccaaacgcaauucuuguccugugcugguuuagcuacucaagaguugugacuggacauccgug	2L:21839679..21839748:-	-0.053	0.998185	NA	NA	NA	NA	NA	NA	NA	NA	NA	NA	0.028	NA
aga-mir-137	known	uauugcuugagaauacacguag	acgcguauucuuggguuac	acgcguauucuuggguuacuaacacacuguuuauguuguuauugcuugagaauacacguag	2L:11039440..11039501:+	0.018	0.998185	-0.066	0.978102	0.171	0.987961	-0.496	0.980053	0.05	0.9774	-0.241	NA	-0.013	NA
aga-mir-7	known	uggaagacuagugauuuuguuguu	caauaaaucucucgucuuucua	uggaagacuagugauuuuguuguuuggcuuaugauacuaacaauaaaucucucgucuuucua	2L:8302909..8302971:-	0.221	0.998185	0.68	0.634236	0.303	0.987961	0.603	0.980053	-0.054	NA	0.533	NA	0.082	NA
aga-mir-308	known	cgcaguauaucccugugaguuug	aaucacaggaguauacugu	cgcaguauaucccugugaguuugcuacuuuucaauggucaaaucacaggaguauacugu	3L:40899926..40899985:-	-0.363	0.998185	0.431	0.894608	-0.101	NA	0.166	0.980053	0.362	NA	-0.381	NA	0.072	NA
aga-mir-10361a-3	known	acacgauaagaggaaaguuuacg	uaaaugauccuuuuaucguguac	acacgauaagaggaaaguuuacguuucaaucggauguucguaaaugauccuuuuaucguguac	X:1724609..1724672:+	-0.014	0.998185	0.471	NA	0.098	NA	0.659	0.980053	-0.087	NA	0.256	NA	0.022	NA
aga-mir-10361a-3	known	acacgauaagaggaaaguuuacg	uaaaugauccuuuuaucguguac	acacgauaagaggaaaguuuacguuucaaucggauguucguaaaugauccuuuuaucguguac	X:1722756..1722819:+	-0.014	0.998185	0.471	NA	0.098	NA	0.659	0.980053	-0.087	NA	0.256	NA	0.022	NA
aga-mir-10361a-3	known	acacgauaagaggaaaguuuacg	uaaaugauccuuuuaucguguac	acacgauaagaggaaaguuuacguuucaaucggauguucguaaaugauccuuuuaucguguac	X:1723463..1723526:+	-0.014	0.998185	0.471	NA	0.098	NA	0.659	0.980053	-0.087	NA	0.256	NA	0.022	NA
aga-mir-10374	known	cuuuguuuaaauuguuugucgcc	ugaguuaacaaucgaugacagguug	ugaguuaacaaucgaugacagguugaagguggcuaugcagaaaaggcuuuguuuaaauuguuugucgcc	2L:18098726..18098795:+	0.079	0.998185	-0.19	0.923475	-0.276	NA	-0.408	0.980053	-0.28	NA	0.04	NA	-0.197	NA
aga-chrunkn_316148	known	cccuguggaacaccauguacga	ucacggcugguguuccacaggguu	ucacggcugguguuccacaggguucgauucuuggccccacccuguggaacaccauguacga	UNKN:29814153..29814214:-	-0.029	0.998185	-0.09	0.972477	0.384	0.987961	-0.135	0.980053	0.07	0.9774	-0.883	NA	-0.367	NA
aga-chrx_364212	known	uccggcuaccgacuaacggcuc	gucacuagccugcagccggagc	gucacuagccugcagccggagcuggcguccgacaauuccggcuaccgacuaacggcuc	UNKN:7519547..7519605:-	0.376	0.998185	-0.224	0.923475	0.393	NA	0.531	0.980053	0.227	NA	0.046	NA	0.026	NA
aga-mir-2b	known	uaucacagccagcuuugaaga	ucucaaaguggcugugaaaug	ucucaaaguggcugugaaaugcguccuucacuguguaagggaagauuccuuuuucgcauaucacagccagcuuugaaga	2L:37757411..37757490:-	0.049	0.998185	-0.114	0.957644	-0.289	0.987961	0.033	0.997818	0.001	0.996782	0.536	0.340162	0.063	0.984137
aga-chr2l_32652	known	ccggugaacugcugugcaggggcgc	gcacaggaggcgaccgugaugccgcg	ccggugaacugcugugcaggggcgcgcaggaugaugguaaugacgaugauaaugaugugggugcacaggaggcgaccgugaugccgcg	2L:2780371..2780459:-	0.085	0.998185	0.622	0.634236	-0.02	0.987961	0.676	0.96964	0.073	0.9774	0.781	NA	0.052	0.984137
aga-chr2r_79518	known	ugcauucaguggggcggucg	uccuccgugaaugacgcguauc	uccuccgugaaugacgcguauccccgcguauauagacgugcauucaguggggcggucg	2R:7197877..7197935:-	0.771	0.998185	-0.241	0.923475	-0.325	0.987961	0.819	0.96964	-0.391	0.9774	0.693	NA	-0.381	NA
aga-mir-996	known	ugacuagauuacaugcucgu	gcgugcauguuuucuaguacacg	gcgugcauguuuucuaguacacguuuucaguuaaaguuucgugacuagauuacaugcucgu	2R:55572845..55572906:-	-0.067	0.998185	0.578	0.579946	-0.063	0.987961	0.25	0.980053	0.232	0.9774	0.114	NA	-0.143	0.984137
aga-chr2l_33397	known	gaaggaacuucugcugugaucu	uaucacaguaguuguacuuuaa	gaaggaacuucugcugugaucugaguuaggaucauaucacaguaguuguacuuuaa	3R:43008878..43008934:-	0.604	0.998185	0.332	0.894608	-0.187	0.987961	-0.167	0.980053	-0.322	0.9774	1.002	NA	-0.035	0.984137
aga-mir-1890	known	ugaaaucuuugauuagguc	gcuaauuggaguauuucuug	gcuaauuggaguauuucuugaggaauauuuuugacaagcucaugaaaucuuugauuagguc	3R:21181098..21181159:-	0.054	0.998185	0.625	0.671014	0.033	0.987961	-0.17	0.980053	0.331	0.9774	0.026	NA	-0.117	NA
aga-mir-989	known	ugugaugugacguagugguacc	cgccgcuacguugcuuucacuug	cgccgcuacguugcuuucacuugguacgcucguauaguauagagcuaaaaguaaacauagauccaugugaugugacguagugguacc	3L:2905419..2905506:+	0.446	0.998185	-0.542	0.671014	0.2	0.987961	-0.309	0.980053	-0.231	0.9774	-0.167	0.790552	-0.113	0.984137
aga-mir-14	known	ucagucuuuuucucucuccu	gggagcgagauuaaggcuugcu	gggagcgagauuaaggcuugcugguuaucacguuaaacguagucagucuuuuucucucuccu	3R:24898055..24898117:+	0.054	0.998185	-0.19	0.923475	-0.541	0.802114	-0.678	0.978322	-1.742	4.33828e-07	-0.19	0.719421	-0.853	0.0489046
aga-mir-1	known	uggaauguaaagaaguauggag	ccaugcuuccuugcauucaaua	ccaugcuuccuugcauucaauaguauguuuguaaaacccuauggaauguaaagaaguauggag	3R:10569168..10569231:-	-0.028	0.998185	-0.162	0.934881	0.126	0.987961	0.297	0.980053	0.118	0.9774	-0.184	NA	-0.12	NA
aga-chr3r_170005	known	gaaggaacuucugcugugaucu	uaucacaguaguuguacuuuaa	gaaggaacuucugcugugaucugaguuauagaucauaucacaguaguuguacuuuaa	2L:3537079..3537136:-	0.604	0.998185	0.332	0.894608	-0.187	0.987961	-0.167	0.980053	-0.322	0.9774	1.002	NA	-0.035	0.984137
aga-mir-286	known	ugacuagaccgaacacucg	auugucggacuagucgcu	auugucggacuagucgcugucgcagucauucgguuucaccuuagugacuagaccgaacacucg	3R:43009411..43009474:-	0.004	0.998185	0.088	NA	0.005	NA	0.189	0.980053	-0.02	NA	0.086	NA	-0.054	NA
aga-mir-10364	known	uaugaugcuguugaugggau	cccauuccacagcaucaccag	cccauuccacagcaucaccagacguucgcucuuaugaugcuguugaugggau	X:6190755..6190807:-	-0.063	0.998185	0.173	NA	-0.201	NA	0.469	0.980053	0.048	NA	0.324	NA	-0.042	NA
aga-mir-309	known	ucacugggcaaaguuugucgca	cgacaaacuccguccagagggug	cgacaaacuccguccagaggguguccgauuucaaugaacucaucacugggcaaaguuugucgca	3R:43008714..43008778:-	0.944	0.643239	0.408	0.885312	-0.344	0.987961	0.393	0.980053	-0.229	0.9774	1.01	NA	-0.261	0.984137
aga-mir-11	known	caucacagucugaguucuugcu	uaagaagcagcgcaggucuguguggug	caucacagucugaguucuugcucgaugguucgcaccgucauccgaacguuagccgaggguaagaagcagcgcaggucuguguggug	2R:13042083..13042169:+	0.178	0.998185	0.525	0.568514	0.116	0.987961	-0.024	0.997818	0.088	0.9774	0.352	0.517182	-0.194	0.984137
aga-chr3l_118320	known	augggguuugaccugcugggcu	ccccggguaaaacccgcacca	augggguuugaccugcugggcuuggggauuuaaacacgccccggguaaaacccgcacca	3L:34333696..34333755:+	0.177	0.998185	-0.16	0.923475	-0.242	0.987961	-0.266	0.980053	-0.159	0.9774	-0.259	NA	-0.198	0.984137
aga-mir-10375a	known	uaaugcgcuuucuaugauguag	acaucauagaaaguguuaaugcg	acaucauagaaaguguuaaugcgauuuauauguuucugcucguaaugcgcuuucuaugauguag	X:1722334..1722398:+	0.137	0.998185	0.529	NA	0.438	NA	NA	NA	0.17	NA	0.244	NA	0.073	NA
aga-chrx_354908	known	aaccgacagaucauuggccaga	augccgaugcucugguugguuca	augccgaugcucugguugguucaaacuuguaacgaacauuuugaaccgacagaucauuggccaga	X:6133083..6133148:-	-0.064	0.998185	0.342	0.894608	0.163	0.987961	0.656	0.980053	0.532	0.69733	0.449	NA	0.205	0.984137
aga-chr2l_4162	known	aggauuacgaugaaguguuugcgcc	ggcaaacgaccuuucguagucugau	aggauuacgaugaaguguuugcgccgguagucaggcaaacgaccuuucguagucugau	UNKN:17752498..17752556:+	-0.148	0.998185	0.09	0.957678	0.3	0.987961	-0.44	0.980053	-0.035	0.9774	-0.048	NA	0.052	0.984137
aga-mir-277	known	uaaaugcacuaucuggua	ucagaggugcauuuaca	ucagaggugcauuuacaucgaacuauuccaguugagguauuuguaaaugcacuaucuggua	2R:28234536..28234597:-	0.23	0.998185	0.47	0.568514	-0.087	0.987961	0.136	0.980053	0.17	0.9774	0.856	0.0465892	0.159	0.984137
aga-chr2l_4162	known	aggauuacgaugaaguguuugcgcc	ggcaaacgaccuuucguagucugau	aggauuacgaugaaguguuugcgccgguagucaggcaaacgaccuuucguagucugau	3L:2692908..2692966:-	-0.148	0.998185	0.09	0.957678	0.3	0.987961	-0.44	0.980053	-0.035	0.9774	-0.048	NA	0.052	0.984137
aga-chr2l_4162	known	aggauuacgaugaaguguuugcgcc	ggcaaacgaccuuucguagucugau	aggauuacgaugaaguguuugcgccgguagucaggcaaacgaccuuucguagucugau	2L:34374..34432:+	-0.148	0.998185	0.09	0.957678	0.3	0.987961	-0.44	0.980053	-0.035	0.9774	-0.048	NA	0.052	0.984137
aga-chr2l_4162	known	aggauuacgaugaaguguuugcgcc	ggcaaacgaccuuucguagucugau	aggauuacgaugaaguguuugcgccgguagucaggcaaacgaccuuucguagucugau	2R:52863996..52864054:-	-0.148	0.998185	0.09	0.957678	0.3	0.987961	-0.44	0.980053	-0.035	0.9774	-0.048	NA	0.052	0.984137
aga-chr2r_70383	known	cgggcuguugcagcaggugccu	acgccugucagcagucagug	acgccugucagcagucagugaguguggagcacgggcuguugcagcaggugccu	2R:57684035..57684088:+	0.331	0.998185	0.175	0.923475	0.053	NA	0.23	0.980053	-0.012	NA	0.11	NA	-0.024	NA
aga-chr2l_4162	known	aggauuacgaugaaguguuugcgcc	caaaugaccuuucguagucugau	aggauuacgaugaaguguuugcgccgguaguuaggcaaaugaccuuucguagucugau	2L:1264701..1264759:+	-0.148	0.998185	0.09	0.957678	0.3	0.987961	-0.44	0.980053	-0.035	0.9774	-0.048	NA	0.052	0.984137
aga-mir-307	known	ucacaaccuccuugagugagc	ucacucaaccugggugugaug	ucacucaaccugggugugaugcuuuuuugaaucaucacaaccuccuugagugagc	3L:34537932..34537987:+	0.293	0.998185	0.882	0.486162	0.242	NA	1.296	0.831897	0.022	NA	0.626	NA	0.079	NA
aga-mir-31	known	uggcaagauguuggcauagcua	uagcuauucaacuucuuguuuau	uggcaagauguuggcauagcuaaaagauuuggauuuagcuauucaacuucuuguuuau	X:14375922..14375980:+	0.748	0.637884	-0.175	0.923475	0.326	0.987961	0.264	0.980053	-0.179	0.9774	0.329	NA	-0.263	0.984137
aga-chr3l_135613	known	uaagugcaaaucguuguagucgguu	uauauacugguaugcccuuuuucgaac	uaagugcaaaucguuguagucgguuagccguauauacugguaugcccuuuuucgaac	3L:31252130..31252187:-	0.29	0.998185	0.497	0.873368	-0.11	0.987961	0.362	0.980053	-0.224	0.9774	0.336	NA	-0.384	NA
aga-chr3l_135613	known	uaagugcaaaucguuguagucgguu	uauauacugguaugcccuuuuucgaac	uaagugcaaaucguuguagucgguuagccguauauacugguaugcccuuuuucgaac	UNKN:11849226..11849283:+	0.29	0.998185	0.497	0.873368	-0.11	0.987961	0.362	0.980053	-0.224	0.9774	0.336	NA	-0.384	NA
aga-mir-210	known	cuugugcgugugacaacggcu	agcugcugaccacugcacaagau	agcugcugaccacugcacaagauuagaaugcgacucuugugcgugugacaacggcu	X:21450346..21450402:+	0.33	0.998185	0.511	0.568514	-0.08	0.987961	0.55	0.96964	0.07	0.9774	0.503	0.358956	-0.214	0.984137
aga-let-7	known	ugagguaguugguuguauagu	uauuaguaucagcuaccgaagc	uauuaguaucagcuaccgaagcagacggcaucaaaguaagcuguaauuagugugccuacucccguguugagguaguugguuguauagu	3R:10270762..10270850:-	0.228	0.998185	-0.33	0.894608	-0.385	0.987961	-0.666	0.96964	-0.543	0.631361	0.089	0.871494	-0.206	0.984137
aga-mir-10379	known	uugggcgcuaucuacaauguag	gccuacuagaagcuuccagua	uugggcgcuaucuacaauguaguaucuugcauugaugcgccaacugccuacuagaagcuuccagua	X:1724444..1724510:+	0.484	0.998185	0.693	0.568514	0.359	0.987961	-0.435	0.980053	-0.171	0.9774	0.678	NA	-0.293	0.984137
aga-mir-10379	known	uugggcgcuaucuacaauguag	gccuacuagaagcuuccagua	uugggcgcuaucuacaauguaguaucuugcauugaugcgccaacugccuacuagaagcuuccagua	X:1723298..1723364:+	0.484	0.998185	0.693	0.568514	0.359	0.987961	-0.435	0.980053	-0.171	0.9774	0.678	NA	-0.293	0.984137
aga-mir-33	known	caguacuucugcaaugcaaccc	gaaguccggcagacacucgau	caguacuucugcaaugcaacccgaaggcgucagcuucuaacccgagcggacauuaccaucguggaaguccggcagacacucgau	X:1255951..1256035:-	-0.143	0.998185	0.207	0.923475	-0.09	0.987961	0.443	0.980053	-0.351	0.9774	0.486	NA	0.098	0.984137
aga-mir-286	known	ugacuagaccgaacacucg	uguguguguuguuaug	ugacuagaccgaacacucgcguccuaaacgaacgacccauucguccuguauguguguguguguuguuaug	3R:43009360..43009430:-	0.004	0.998185	0.088	NA	0.005	NA	0.189	0.980053	-0.02	NA	0.086	NA	-0.054	NA
aga-chr3l_135613	known	uaagugcaaaucguuguagucgguu	ugccaaaagauucacuacggacauauu	ugccaaaagauucacuacggacauauucuauaucaaagucguacgauaaaagaguaagugcaaaucguuguagucgguu	UNKN:11849172..11849251:+	0.29	0.998185	0.497	0.873368	-0.11	0.987961	0.362	0.980053	-0.224	0.9774	0.336	NA	-0.384	NA
aga-chr3l_135613	known	uaagugcaaaucguuguagucgguu	ugccaaaagauucacuacggacauauu	ugccaaaagauucacuacggacauauucuauaucaaagucguacgauaaaagaguaagugcaaaucguuguagucgguu	3L:31252162..31252241:-	0.29	0.998185	0.497	0.873368	-0.11	0.987961	0.362	0.980053	-0.224	0.9774	0.336	NA	-0.384	NA
aga-mir-13b	known	uaucacagccauuuugacgaguu	cucuugagcaauguacagcgugggagg	uaucacagccauuuugacgaguuugaccacucuugagcaauguacagcgugggagg	2L:37757546..37757602:-	0.049	0.998185	0.045	0.987883	-0.189	0.987961	-0.008	0.997818	-0.037	0.9774	0.022	NA	-0.184	NA
aga-mir-7	known	uggaagacuagugauuuuguuguu	ucucgaacauccucugcugccaug	ucucgaacauccucugcugccauggcaaaacauuguauggaagacuagugauuuuguuguu	2L:8302947..8303008:-	0.221	0.998185	0.68	0.634236	0.303	0.987961	0.603	0.980053	-0.054	NA	0.533	NA	0.082	NA
aga-chr2l_23370	known	guaguccggaguggaguc	cuacgaacuacuccagacaacuc	guaguccggaguggagucguggaucaacuccgacuccggugcgcaaaauaugaauccgacuucggugaacacgaacgacuacgaacuacuccagacaacuc	2L:42944574..42944675:+	1.949	0.000251911	0.351	NA	-0.099	NA	1.836	0.27743	-0.061	NA	2.14	NA	-0.29	NA
